1

2 Isolation of lactic acid bacteria capable of reducing environmental alkyl and fatty  
3 acid hydroperoxides, and the effect of their oral administration on oxidative-  
4 stressed nematodes and rats

5

6 Akio Watanabe<sup>1,2</sup>, Takuro Yamaguchi<sup>3</sup>, Kaeko Murota<sup>4†</sup>, Tadaaki Ishii<sup>3</sup>, Junji Terao<sup>4††</sup>, Sanae Okada<sup>5</sup>, Naoto  
7 Tanaka<sup>5</sup>, Shinya Kimata<sup>1</sup>, Akira Abe<sup>6</sup>, Tomonori Suzuki<sup>7</sup>, Masataka Uchino<sup>7</sup>, Youichi Niimura<sup>1,7\*</sup>

8

9

10 <sup>1</sup> Department of Bio-Science, Tokyo University of Agriculture, Setagaya-ku, Tokyo 156-8502, Japan

11

12 <sup>2</sup> TAIYO Corporation, Laboratory, Higashiyodogawa-ku, Osaka 533-0023, Japan (Present address)

13

14 <sup>3</sup> Department of Molecular Life Science, Tokai University School of Medicine, Isehara, Kanagawa 259-1193,  
15 Japan

16

17 <sup>4</sup> Department of Nutrition, School of Medicine, University of Tokushima, Tokushima, Tokushima, 770-8503,  
18 Japan

19

20 <sup>5</sup> Nodai Culture Collection Center, Tokyo University of Agriculture, Setagaya-ku, Tokyo 156-8502, Japan

21

22 <sup>6</sup> Department of Ophthalmology, Sapporo Medical University, Hokkaido 060-8556, Japan

23

24 <sup>7</sup> Department of Molecular science of Bacteria, Tokyo University of Agriculture, Setagaya-ku, Tokyo 156-  
25 8502, Japan

26

27 Corresponding author\*

28 E-mail: [niimura@nodai.ac.jp](mailto:niimura@nodai.ac.jp)

29

30 Present address

31 <sup>†</sup> Institute of Agricultural and Life Sciences, Academic Assembly, Shimane University, Matsue, Simane 690-

32 8504 Japan

33

34 <sup>††</sup> Faculty of Clinical Nutrition and Dietetics, Konan Women's University, Higashinada-ku, Kobe, Hyogo 658-

35 0001 Japan

## 1 **Abstract**

2           Reinforcement of hydroperoxide-eliminating activity in the intestines and colon should prevent  
3 associated diseases. We previously isolated a lactic acid bacterium, *Pediococcus pentosaceus* Be1, that facilitates  
4 a 2-electron reduction of hydrogen peroxide to water. In this study, we successfully isolated an alternative lactic  
5 acid bacterium, *Lactobacillus plantarum* P1-2, that can efficiently reduce environmental alkyl hydroperoxides  
6 and fatty acid hydroperoxides to their corresponding hydroxy derivatives through a 2-electron reduction. Each  
7 strain exhibited a wide concentration range with regard to the environmental reducing activity for each  
8 hydroperoxide. Given this, the two lactic acid bacteria were orally administered to the oxygen-sensitive short-  
9 lived nematode mutant, and this resulted in a significant expansion of its lifespan. This observation suggests that  
10 *P. pentosaceus* Be1 and *L. plantarum* P1-2 inhibit internal oxidative stress. To determine the specific organs  
11 involved in this response, we performed a similar experiment in rats, involving induced lipid peroxidation by  
12 iron-overloading. We observed that only *L. plantarum* P1-2 inhibited colonic mucosa lipid peroxidation in rats  
13 with induced oxidative stress.

14

## 15 **Introduction**

16           The intestines and colon are key points where defense mechanisms against various types of diseases  
17 and stresses are employed. Such diseases are often triggered by oxidative stress, which is the primary stress at  
18 these points *in vivo*. Although hydroperoxides (i.e., hydrogen peroxide and lipid hydroperoxide) are major causes  
19 of oxidative stress, the reductase activity in colonic mucosa for hydroperoxides is lower than that in other organ

1 tissues [1]. Enhancement of hydroperoxide reductase activity in the colonic mucosa can prevent bowel diseases.  
2 It has been shown that administration of *Lactococcus lactis*, which produces a catalase from the *Bacillus* gene,  
3 prevents chemically induced colon cancer in mice [2]. Similar to hydrogen peroxide, lipid hydroperoxide is a  
4 downstream reaction product of ROS that strongly contributes to bowel disease [3]. A number of chemical anti-  
5 oxidant treatments for lipid hydroperoxide exist [4-6]. The microbial antioxidative effects of the *Streptococcus*  
6 *thermophilus* IT2001 strain on the colonic mucosa of iron-overloaded mice have been reported [7]. Feeding of  
7 the *S. thermophilus* YIT2001 strain to mice resulted in high inhibitory activity against lipid peroxidation in  
8 liposomes, resulted in a decrease of lipid hydroperoxide in the colonic mucosa [7].

9 Therefore, lactic acid bacteria that can eliminate environmental lipid hydroperoxide directly, should be  
10 vigorously investigated as probiotics to prevent bowel diseases. Previously, we isolated the *Pediococcus*  
11 *pentosaceus* Be1 strain that reduces environmental hydrogen peroxides [8].

12 Based on this previous isolation method, which was improved upon in this study, we successfully  
13 isolated the *Lactobacillus plantarum* P1-2 strain that reduces environmental fatty acid hydroperoxides, which are  
14 primary peroxidation products of free fatty acids and are also derived from the hydrolysis of esterified lipid  
15 hydroperoxides. We then investigated the effects resulting from the administration of the two isolated lactic acid  
16 bacteria strains that reduce environmental hydrogen peroxide (*P. pentosaceus* Be1 strain) and fatty acid  
17 hydroperoxide (*L. plantarum* P1-2 strain) in this study. We first examined the inhibitory effects against internal  
18 oxidative stress in *C. elegans*  $\Delta fer-15; mev-1$  [9], as the free-living nematode *Caenorhabditis elegans* offers  
19 several distinct advantages for aging research at the organismal level [10, 11]. As the distinct inhibitory effects

1 were observed in both strains, we next investigated the effects of the *L. plantarum* P1-2 and *P. pentosaceus* Be1  
2 strains on major organs in mammals, particularly the intestines and colon in an oxidative stress rat model.

3

## 4 **Materials and methods**

### 5 **Selective isolation medium for lactic acid bacteria**

6 To screen bacteria exhibiting high lipid hydroperoxide-eliminating activity, we used modified GYP  
7 medium [8] supplemented with 1% linoleic acid hydroperoxide serving as the fatty acid hydroperoxide. Linoleic  
8 acid hydroperoxide was prepared in bulk by oxidizing 250 ml of linoleic acid by incorporating 100% O<sub>2</sub> at 70°C.  
9 This was suspended in 5% sterilized Tween 80 solution (v/v).

10

### 11 **Identification of lactic acid bacteria**

12 Lactic acid bacteria strains that exhibit high lipid hydroperoxide-eliminating ability were isolated from  
13 86 fermented foods following five cycles of plate culture using the enrichment medium prepared above at 37°C.  
14 We identified lactic acid bacteria strains based on taxonomical characteristics such as morphology, fermentation  
15 form, catalase, ratio of L-form to D-form in lactic acid production, sugar requirement pattern, and cell wall  
16 components [12]. We also identified strains by 16S rDNA sequencing.

17

### 18 **Evaluation of bacterial strains and their culture conditions**

19 *L. plantarum* P1-2, *P. pentosaceus* Be1, other tested strains from fermented foods, and their type strains

1 were cultured under various conditions. Specifically, the *L. plantarum* P1-2 strain, *L. plantarum* NRIC1067<sup>T</sup>, *P.*  
2 *pentosaceus* Be1 strain, *P. pentosaceus* NRIC 0099<sup>T</sup>, *Lactobacillus casei* NRIC 0644<sup>T</sup>, *Lactobacillus delbrueckii*  
3 subsp. *bulgaricus* NRIC 1688<sup>T</sup>, *Lactobacillus delbrueckii* subsp. *delbrueckii* NRIC 0665<sup>T</sup>, *Lactobacillus*  
4 *fermentum* NRIC 1752<sup>T</sup>, and *Lactobacillus salivarius* subsp. *salicinius* NRIC 1072<sup>T</sup> were aerobically cultured  
5 in GYP medium with shaking at 37°C. *Lactobacillus alimentarius* NRIC 1640<sup>T</sup>, *Lactobacillus ferciminis* NRIC  
6 0492<sup>T</sup>, *Lactococcus lactis* subsp. *lactis* NRIC 1149<sup>T</sup>, *Leuconostoc mesenteroides* subsp. *mesenteroides* NRIC  
7 1541<sup>T</sup>, *Weissella viridescens* NRIC 1536<sup>T</sup>, *Weissella cibaria* NRI 0527<sup>T</sup>, and *P. acidilactici* NRIC 0115<sup>T</sup> were  
8 aerobically cultured in GYP medium with shaking at 30°C. *Lactobacillus acidophilus* NRIC1547<sup>T</sup> and *S.*  
9 *thermophilus* NRIC0256<sup>T</sup> were grown in static culture in GYP medium at 37°C. *Lactobacillus brevis* NRIC 1638  
10 <sup>T</sup> and *P. damnosus* NRIC 0214<sup>T</sup> were grown in static culture at 30°C in MRS medium. *Bacillus subtilis* NRIC  
11 1015 and *Escherichia coli* NRIC 1509 were grown aerobically in NB medium at 37°C.

12

### 13 **Evaluation of alkyl and fatty acid hydroperoxide-eliminating activity by lactic acid bacteria**

14 Bacterial cells were harvested at their late logarithmic or early stationary growth phase by centrifugation  
15 and washed with 50 mM sodium phosphate buffer (pH 7.0). The late logarithmic or early stationary growth phase  
16 was determined based on optical density at 660 nm. After the value of the cell suspension was adjusted to 1.6, it  
17 was used for determining the dry cell weight and measuring the hydroperoxide-eliminating activity. For  
18 determination of the dry cell weight, 200 ml of the bacterial cell suspension was centrifuged at 48,400 × g for 10  
19 min, and the cell pellet was dried at 100°C until a constant weight was achieved (S1 Table).

1           To measure hydroperoxide-eliminating activity, the remaining bacterial suspension was incubated with  
2   0.3, 1.0, or 3.0 mM cumene hydroperoxide serving as alkyl hydroperoxides, or 0.25, 0.5, or 1.0 mM fatty acid  
3   hydroperoxide serving as linoleic acid hydroperoxide in the presence of 50 mM glucose for 1.5 h at 37°C with  
4   shaking. After the reaction was terminated by centrifugation to remove the bacterial cells at 4°C, remaining  
5   hydroperoxides were identified by the method described below.

6           The fatty acid hydroperoxide used in this assay was prepared based on the method of lipoxygenase  
7   oxidation of linoleic acid [13] (Funk *et al.*, 1976). After incorporation with 100% O<sub>2</sub> the linoleic acid mixture  
8   was extracted using diethylether, which was then removed by evaporation. To evaluate linoleic acid  
9   hydroperoxide-eliminating activity, linoleic acid hydroperoxide was dissolved in a 2.5% Triton-X P-100 solution.

10

#### 11   **Determining the concentration of identified cumene hydroperoxide and linoleic acid hydroperoxide**

12           To determine the remaining cumene hydroperoxide or fatty acid hydroperoxide concentration after  
13   the reaction with living cells, we applied the modified ferric thiocyanate assay [14]. The ferric thiocyanate mixture  
14   consisted of 960 µl chloroform:methanol (2:1 v/v), 40 µl of supernatant containing cumene or lipid  
15   hydroperoxide, and 200 µl colorimetric reaction mixture. The colorimetric reaction mixture contained 3%  
16   KSCN/methanol and 4.5 mM FeSO<sub>4</sub>·7H<sub>2</sub>O/0.2 N HCl (3:1 v/v). Each assay mixture was added at 25°C for the  
17   colorimetric reaction. After 5 min, the solution was removed by centrifugation, followed by a spectrophotometric  
18   measurement at 500 nm. A calibration curve with cumene hydroperoxide was generated when we evaluated the  
19   cumene hydroperoxide-eliminating activity. Calibration curves for 13S-hydroperoxy-9z and 11E-

1 octadecatrienoic acid (13-HpODE, Cayman Chemical) were also prepared to evaluate linoleic acid  
2 hydroperoxide-eliminating activity.

3 We also analyzed the reaction product of cumene hydroperoxide by HPLC. An HPLC system equipped  
4 with a PEGASIL ODS C-18 (4.6 mm × 250 mm, Senshu Scientific co., Ltd.) reverse phase HPLC column, L-  
5 7100 pump (Hitachi), L-7420 UV-VIS detector (Hitachi), and D-7500 recorder (Hitachi) was used, and the  
6 injection volume was 100 µl. The products were eluted with acetonitrile:5 mM potassium phosphate buffer, pH  
7 7 (3:7), at a flow rate of 1 ml/min, at 40°C with monitoring at 265 nm. Product elution peaks were identified by  
8 comparing authentic standards under identical elution conditions.

9 Additionally, we analyzed the reaction product of linoleic acid hydroperoxide by HPLC. The HPLC  
10 system was equipped with a Jupiter 5 µm C18 (300 Å 250 mm × 4.6 mm, Phenomenex) reverse phase HPLC  
11 column, LC-20A pump (Shimadzu), SPD-20A PDA detector, and CBM-20 controller. The injection volume  
12 was 5 µl. The products were eluted with 1 g/L acetic acid:acetonitrile:tetrahydrofuran (52:30:18) at a flow rate of  
13 0.8 ml/min at 40°C with monitoring at 234 nm. Product elution peaks were identified by comparing authentic  
14 standards, specifically 13-HpODE (13S-hydroperoxy-9Z, 11E-octadecadienoic acid; Cayman Chemical) and  
15 13-HODE (13S-hydroxy-9Z, 11E-octadecadienoic acid; Cayman Chemical), under identical elution conditions.

16

### 17 **Animal test 1: Evaluating the lifespan of the short-lived, oxygen-sensitive *C. elegans* mutant**

18 In this study, we evaluated the lifespan of *C. elegans* with mutations in both *fer-15* and *mev-1*. The *C.*  
19 *elegans fer-15* mutant was sterile when grown at 25°C, as under these conditions spermatids failed to activate

1 into spermatozoa. Mutations in *mev-1* render animals hypersensitive to high oxygen concentrations due to  
2 increased superoxide levels [15]. These mutant *C. elegans* also accumulate more fluorescent material (lipofuscin)  
3 with age [16]. The *C. elegans* *Afer-15;mev-1* strain was obtained from the Tokai University School of Medicine  
4 Basic Medical Science and the Molecular Medicine Department of Molecular Life Sciences. We administered  
5 lactic acid bacteria strains that have high or low hydroperoxide-eliminating activity to *C. elegans* *Afer-15;mev-1*,  
6 a low lifespan mutant with high oxygen sensitivity.

7 We defined four administration groups of tested bacteria strains. These included the *E. coli* OP50 strain  
8 as the control group (OP50 group), the *L. plantarum* P1-2 strain that demonstrates high fatty acid hydroperoxide-  
9 reducing ability (P1-2 group), the *P. pentosaceus* Be1 strain that has high hydrogen peroxide-reducing ability  
10 (Be1 group), and the *S. thermophilus* NRIC0256<sup>T</sup> strain that exhibits low hydroperoxide eliminating ability (ST  
11 group). Animals were cultured on nematode growth medium NGM agar plates seeded with the *E. coli* OP50  
12 strain at 20°C. Embryos (eggs) were collected from young adult hermaphrodites on NGM agar plates using  
13 alkaline sodium hypochlorite [17]. The released eggs were allowed to hatch through overnight incubation at 20°C  
14 in S buffer [18]. We continuously grew young stage nematodes until the L4 stage on NGM agar plates (90 mm),  
15 with live bacteria (*Escherichia coli* strain OP50) added as food. L4 stage nematodes were transferred to 10  
16 modified GYP medium agar plates (30 mm) that contained 100 mM MES at pH 6.0, with each live bacteria  
17 group (*E. coli* OP50 strain, *L. plantarum* P1-2 strain, *P. pentosaceus* Be1 strain, and *S. thermophilus* NRIC0256<sup>T</sup>)  
18 and the lifespan at 25°C was evaluated to prevent progeny production. Death was defined as the loss of  
19 spontaneous movement and lack of response to touch with a platinum wire.



1           Statistical analysis was carried out by Student's *t*-test and Tukey's multiple-range test. The least  
2 significant difference test was used for means separation at  $P < 0.05$  within strains.

3

4   **Animal test 2-1: Administration of lactic acid bacteria to iron-overloaded rats experiencing induced lipid**  
5   **peroxidation**

6           All animal experiments were performed with permission from the Committee on Animal Experiments  
7 of Tokushima University (permit number: 11,013) according to the guidelines for the care and use of laboratory  
8 animals set by the University (Tokushima, Japan).

9           Wistar rats (6-week-old male, Japan SLC, Shizuoka, Japan) were maintained in a room at  $23 \pm 1^\circ\text{C}$  on  
10 a 12-h light–dark cycle. Rats were maintained on AIN-76 as their basal diet. In the experimental phase, we  
11 administered various diets. Specifically, the control group received the basal diet and 5% skim milk powder, the  
12 Fe group received the basal diet plus 0.5% ferrous fumarate and 5% skim milk powder, and the LAB group  
13 received basal diet plus 0.5% ferrous fumarate and 5% lyophilized lactic acid bacteria powder (S2 Table).  
14 Lyophilized lactic acid bacteria powder consists of a 1:9 ratio of dried lactic acid bacteria cells:skimmed milk  
15 powder at approximately  $10 \times 10^9$  cfu/g. This powder was mixed with the basal diet and stored at  $-18^\circ\text{C}$  until the  
16 experimental phase.

17           The rats had free access to food and water, and the food was replaced every 24 hours. After one week  
18 of AIN-76 diet treatment, two weeks of iron-enriched diets including lactic acid bacteria were administered.  
19 Before the experimental phase, rats received AIN-76 for one week. In the experimental phase, rats maintained

1 the control group diet, Fe group diet, or the LAB group diet for two weeks. Rats were randomly assigned to each  
2 group.

3 Body weight was recorded daily, and after the dietary treatments, the rats were anesthetized using  
4 diethyl ether. Rats were sacrificed by cardiocentesis, and blood was collected with heparin sodium on ice and  
5 then centrifuged. The abdomens were opened along the median line, and the stomach, intestines, colon, and liver  
6 were rapidly excised and rinsed gently with ice-cold saline. Stomach, intestines, and colon were opened  
7 longitudinally to collect the respective mucosa.

8

#### 9 **Animal test 2-2: Determination of malondialdehyde in rat organs**

10 The stomach, intestines, colonic mucosa, and liver were prepared as homogenates on ice. Each  
11 homogenate was determined by malondialdehyde [19], and the total protein concentration was quantified using  
12 the Bradford method. We represented lipid peroxidation level as MDA/mg of protein. Data are expressed as the  
13 mean  $\pm$  SD. Differences between the control and iron fumarate group were analyzed by unpaired *t*-test. Data  
14 obtained from over three groups were analyzed using non-repeated analysis of variance (non-repeated ANOVA).  
15 When the result of non-repeated ANOVA was significant ( $P < 0.05$ ), Student–Newman–Keuls methods were  
16 conducted ( $P < 0.05$ ).

17

#### 18 **Nucleotide sequence accession number**

19 The 16S rDNA sequence of the *L. plantarum* P1-2 strain was submitted to the DNA Data Bank of

1 Japan under accession number LC0424332.

## 2 Results

### 3 Isolation of lactic acid bacteria eliminating alkyl and fatty acid hydroperoxide and distribution of their 4 eliminating activity

5 Although the enrichment medium contained sources of ROS, 116 strains of the isolates grew well and  
6 were isolated from various kinds of fermented foods (Table 1). The obtained isolates included 75 strains of  
7 *Lactobacilli*, 24 strains of *Pediococci*, and 17 strains of *Leuconostocs*. Next, we measured the eliminating activity  
8 of cumene hydroperoxide and linoleic acid hydroperoxide in the 116 isolates. We successfully isolated one strain  
9 from the leaven, and this strain displayed the highest eliminating activity for both substrates (Fig 1A and 1B).  
10 Based on the taxonomical characterization [12] and the 16S rDNA sequence of this strain, we identified it as *L.*  
11 *plantarum* P1-2 (S3 Table).

**Table 1. Isolation of lactic acid bacteria exhibiting high eliminating activity for environmental hydroperoxides from fermented foods.**

|                                                                                                | Sources for screening |           |                                 |                                   |        |         |        | Total number |
|------------------------------------------------------------------------------------------------|-----------------------|-----------|---------------------------------|-----------------------------------|--------|---------|--------|--------------|
|                                                                                                | Rice malts            | Rice bran | Fermented vegetables with salts | Salted radish aged with koji rice | Leaven | Seafood | Others |              |
| Number of sources for screening                                                                | 26                    | 28        | 13                              | 4                                 | 8      | 4       | 3      | 86           |
| Isolates in 1st isolation step                                                                 | 352                   | 198       | 38                              | 183                               | 282    | 15      | 7      | 1075         |
| Isolates after 5th isolating step with enrichment                                              | 80                    | 11        | 1                               | 8                                 | 30     | 15      | 3      | 148          |
| Isolates selected by cumene hydroperoxide and linoleic acid hydroperoxide eliminating activity | 29                    | 25        | 10                              | 6                                 | 24     | 15      | 7      | 116          |

12 We compared hydroperoxide eliminating capacities of the *L. plantarum* P1-2 strain, *P. pentosaceus*  
13 Be1, and typical strains of lactic acid bacteria applied to the food industry, including fermentation. Using cumene  
14 hydroperoxide, the eliminating activities for the substrate were widely preserved in *L. plantarum*, *P. pentosaceus*,  
15

1 including *P. pentosaceus* Bel strain, and *L. lactis* (Fig 1A). However, high eliminating activity for linoleic acid  
2 hydroperoxide was specifically detected in *L. plantarum*. Specifically, the *L. plantarum* P1-2 strain eliminated  
3 over 0.5 mM out of 1.0 mM linoleic acid hydroperoxide in 1.5 h (Fig 1B). Both activities were not detected in  
4 dead cells after heat treatment at 100°C for 10 min (Data not shown).

5

## 6 **The relationship between the tolerance and eliminating activity of alkyl hydroperoxide and linoleic acid** 7 **hydroperoxide-eliminating activity in lactic acid bacteria**

8 To investigate the relationship between the tolerance and eliminating activity of alkyl hydroperoxide  
9 and lipid hydroperoxide-eliminating activity in lactic acid bacteria, we compared the number of living cells and  
10 the reducing activities for cumene and linoleic acid hydroperoxide per dry cell weight (Fig 2A and B). The cells  
11 were treated with various concentrations of hydroperoxides.

12 The *L. plantarum* NRIC1067<sup>T</sup> and *L. plantarum* P1-2 strains sustained both the alkyl hydroperoxide  
13 reducing activity and the number of living cells in the presence of high concentrations of cumene hydroperoxide  
14 of up to 3.0 mM (Fig 2Aa). *E. coli* NRIC1519, *P. pentosaceus* NRIC 0099<sup>T</sup>, and *P. pentosaceus* Bel strains also  
15 exhibited the same tolerance capacity as *L. plantarum* NRIC1067<sup>T</sup> and *L. plantarum* P1-2 under 3.0 mM cumene  
16 hydroperoxide. The eliminating activity for cumene hydroperoxide, however, was much lower than that of *L.*  
17 *plantarum* NRIC1067<sup>T</sup> and *L. plantarum* P1-2 (Fig 2Ab). Although *S. thermophilus* NRIC0256<sup>T</sup> and *L.*  
18 *acidophilus* NRIC1547<sup>T</sup> also retained their cell viability with each cumene hydroperoxide concentration, the  
19 number of *B. subtilis* NRIC1015 viable cells decreased under the same conditions. These strains showed low

1 cumene hydroperoxide eliminating activity (Fig 2Ac).

2 For linoleic acid hydroperoxide, the *L. plantarum* P1-2 strain exhibited potent eliminating activity in  
3 the presence of a high concentration of linoleic acid hydroperoxide, up to 1.0 mM while retaining the number of  
4 living cells (Fig 2Ba). Similar behaviors were also observed in *P. pentosaceus* NRIC 0099<sup>T</sup> and *P. pentosaceus*  
5 Be1 strains. However, the eliminating activities nearly plateaued at 0.25 mM linoleic acid hydroperoxide and  
6 were much lower than those of the *L. plantarum* P1-2 strain (Fig 2Bb). *E. coli* NRIC1519 also retained a  
7 significant number of living cells against each linoleic acid hydroperoxide. In contrast, the numbers of *S.*  
8 *thermophilus* NRIC0256<sup>T</sup>, *L. acidophilus* NRIC1547<sup>T</sup>, and *B. subtilis* NRIC1015 decreased with increased  
9 concentration of linoleic acid hydroperoxide from 0.25 to 3.0 mM. These strains exhibited generally low linoleic  
10 acid hydroperoxide eliminating activity (Fig 2Bc).

11 The *L. plantarum* P1-2 strain clearly showed higher reducing activity for both cumene and linoleic acid  
12 hydroperoxide than did other strains. Also, we examined both hydroperoxide reducing reaction products by  
13 HPLC. The *L. plantarum* P1-2 strain converted cumene hydroperoxide to 2-phenyl-2-propanol (Fig 3A) and  
14 reduced 13-HpODE to 13-HODE (Fig 3B). These results indicate that the *L. plantarum* P1-2 strain reduces  
15 cumene and linoleic acid hydroperoxide by a two-electron reduction.

16

### 17 **Animal test 1: Evaluating the lifespan of the short-lived, oxygen-sensitive *C. elegans* mutant**

18 To investigate the efficacy of the reductase activity for fatty acid hydroperoxide activity of *Lactobacillus*  
19 *plantarum* P1-2 *in vivo*, survival analyses using nematode (*Caenorhabditis elegans*) were performed. *L.*

1 *plantarum* P1-2 was administered to *C. elegans*  $\Delta$ *fer-15* at L4 stage, and its life span was monitored. *E. coli* OP50,  
2 *S. thermophilus* NRIC0256<sup>T</sup> and *P. pentosaceus* Be1 were also investigated. This assay was conducted on GYP  
3 medium instead of NGM medium, as all tested bacteria grow well and exhibit high fatty acid hydroperoxide  
4 activity on GYP compared to that observed on NGM. Additionally, the pH of GYP was fixed at pH 6 with MES  
5 buffer to allow nematodes to live together with the bacteria and assimilate with them without the effects of  
6 bacterial metabolites such as organic acids. Under this condition, *L. plantarum* P1-2 and *P. pentosaceus* Be1 were  
7 likely to prolong the life span of *C. elegans*  $\Delta$ *fer-15* more significantly than were *S. thermophilus* NRIC0256<sup>T</sup>  
8 and *E. coli* OP50, respectively (S1 Fig). To clarify if this life extension is associated with fatty acid hydroperoxide  
9 or hydrogen peroxide reductase activity, the four bacterial strains were administered to a *C. elegans*  $\Delta$ *mevl*  
10 mutant that exhibits oxygen-sensitivity. As a result, *L. plantarum* P1-2 and *P. pentosaceus* Be1 significantly  
11 extended the life span of the mutant compared to *S. thermophilus* NRIC0256<sup>T</sup> ( $p < 0.001$ ) (Fig 4), consistent with  
12 the capacity to reduce hydroperoxide *in vitro* (Fig 1). This result suggested that *L. plantarum* P1-2 and *P.*  
13 *pentosaceus* Be1 are effective for reducing oxidative stresses *in vivo*. To determine the specific organs involved  
14 in these bacterial administrations, further experiments were performed.

15

## 16 **Animal test 2: The effect of lactic acid bacteria administration on the eliminating activity of** 17 **hydroperoxides in iron-loaded rats using the colonic mucosal lipid peroxidation model**

18 Some studies have shown that iron administration increases the levels of lipid peroxidation markers in  
19 rat liver [20]. Similarly, iron increases the levels of lipid a peroxidation marker in the colonic mucosa of mice [7].

1 Iron induces the production of reactive oxygen species (ROS), followed by ROS-induced gastrointestinal mucosa  
2 lipid peroxidation [21] and oxidative stress-induced tissue damage [22]. When we examined the effects of 0.2%  
3 and 0.5% iron fumarate in Wister rats (n = 3), colonic mucosa and liver homogenate MDA increased in a dose-  
4 dependent manner. We settled on an iron fumarate concentration for lipid peroxidation of 0.5%. We also  
5 evaluated the increase of MDA in the gastric mucosa, intestinal mucosa, colonic mucosa, and liver homogenates  
6 and serum in iron fumarate overloaded rats (n = 9). For the gastric mucosa, intestinal mucosa homogenate, and  
7 serum, there was no significant increase of MDA. Conversely, colonic mucosa and liver homogenate both  
8 exhibited a significant increase in MDA (Fig 5). These results suggest that iron overload in rats increases lipid  
9 peroxidation in the liver and colonic mucosa.

10 We also compared the effect of *P. pentosaceus* Be1 group, *L. plantarum* P1-2 group, and *S.*  
11 *thermophilus* NRIC0256<sup>T</sup> group on iron overloaded rats (n = 4). MDA levels were lower in the *L. plantarum*  
12 P1-2 group than in the *S. thermophilus* NRIC0256<sup>T</sup>, and *P. pentosaceus* Be1 groups (S2 Fig). Next, we compared  
13 confirmatively the effect of *L. plantarum* P1-2 and *S. thermophilus* NRIC0256<sup>T</sup> on iron overloaded rats (n = 6).  
14 The MDA levels following administration of *L. plantarum* P1-2 were significantly lower in the colonic mucosa  
15 than those of *S. thermophilus* NRIC0256<sup>T</sup> (Fig 6). We examined the administration effect of heat-treated dead *L.*  
16 *plantarum* P1-2 and *S. thermophilus* NRIC0256<sup>T</sup> cells on iron overloaded rats. Dead lactic acid bacteria cells exert  
17 no significant effect on production of MDA (data not shown). These results indicate that administration of living  
18 *L. plantarum* P1-2 cells decreases lipid peroxidation in the colonic mucosa.

19

## 1 Discussion

2 Hydroperoxides, such as hydrogen peroxide and lipid hydroperoxides, are toxic and thought to  
3 contribute to various diseases and the aging process. Two isolated lactic acid bacteria, *P. pentosaceus* Be1[8] and  
4 *Lactobacillus plantarum* P1-2, show a 2-electron reduction of hydrogen peroxide to water and of fatty acid  
5 hydroperoxides, a type of lipid hydroperoxide, to the corresponding hydroxy derivatives. The oxygen-sensitive  
6 and short-lived nematode mutant, *C. elegans*  $\Delta fer-15; mev-1$ , accelerates the accumulation of hydroperoxides  
7 inside the body due to a lack of superoxide dismutases. The administration of *P. pentosaceus* Be1 and *L.*  
8 *plantarum* P1-2 should decrease hydroperoxides *in vivo*, and with both strains we observed this and an extension  
9 of nematode lifespan.

10 To elucidate which organs are affected by these bacterial administrations, the TBARS assay for  
11 evaluating the oxidative stress tolerance by rat organs was established. Based on the assay condition used in mice  
12 [23], we defined the proper dose of iron(II)-fumarate in rats, and we measured the MDA levels in each organ.  
13 Our results demonstrated significant increases of MDA levels in the colonic mucosa and liver, a finding that is  
14 consistent with previous reports on colonic mucosa in mice [23] and liver in rat [20, 24]. In contrast, the increase  
15 of the MDA level in stomach and intestine mucosa of rats was not observed. This is likely because in the stomach,  
16 iron(II)-fumarate was easily dissolved in gastric juices and then rapidly diffused into the intestine. Alternatively,  
17 lipid hydroperoxides may have been metabolized in the stomach prior to their accumulation in the tissue cells, as  
18 the turnover of intestine mucosa cells is much higher than that in colonic mucosa. Therefore, our findings are in  
19 agreement with the idea that the above specific lipid peroxidation in colonic mucosa is likely due to its



1 vulnerability to oxidative stress compared to that of other gastrointestinal mucosa [1].

2 The administration of *L. plantarum* P1-2 to iron-overloaded rats resulted in a significant decrease in  
3 MDA levels in the colonic mucosa, and administration of *P. pentosaceus* Be1 did not cause this effect. The  
4 accumulation of MDA by a ferrous iron is thought to be primarily responsible for the stimulation of the Fenton  
5 reaction and subsequent accumulation of lipid hydroperoxides. Thus, it is suggested that *L. plantarum* P1-2  
6 possesses the ability to inhibit the Fenton reaction (related reactive oxygen) and/or to stimulate the reduction  
7 activity for lipid hydroperoxides (related free radical). Ito and co-workers also discussed the decrease of MDA  
8 levels in iron-overloaded mice by the administration of *S. thermophiles* YIT2001 as being related to the potential  
9 to eliminate reactive oxygen or free radicals [7].

10 In this study, the decrease of MDA levels following bacterial administration was observed in the case  
11 of *L. plantarum* P1-2 exhibiting high reductase activity for exogenous fatty acid hydroperoxides but was not  
12 observed in *P. pentosaceus* Be1 possessing low activity for these molecules. It is established that a large amount  
13 of unsaturated lipids such as linoleic acids are contained in the digestive tract of humans, where lipid peroxidation  
14 is evoked by endogenous or exogenous reactive oxygen species [1]. Thus, this result suggests that the reductase  
15 activity of *L. plantarum* P1-2 for exogenous fatty acid hydroperoxides is effective for decreasing MDA *in vivo*.  
16 This idea is also supported by the observation that the accumulation of lipofscin derived from lipid  
17 hydroperoxides in *C. elegans*  $\Delta fer-15; mev-1$  was inhibited by administering *L. plantarum* P1-2 more effectively  
18 than by administering *P. pentosaceus* Be1 (data not shown).

19 Although there are several excellent antioxidant investigations in lactic acid bacteria [25-30], to our

1 knowledge, a report describing the reduction of exogenous alkyl hydroperoxides and linoleic acid hydroperoxides  
2 by bacteria has not been published. In this study, we demonstrated that bacteria exhibit reduction ability against  
3 both hydroperoxides; however, it is unclear if *L. plantarum* P1-2 can directly reduce esterified fatty acids such as  
4 phospholipid hydroperoxide and cholesterol. The molecular mechanism by which bacteria reduce  
5 hydroperoxides requires further investigation. Based on these insights, we would like to develop future probiotics  
6 studies.

7

## 8 **Acknowledgements**

9 We thank Satoru Furukawa of the FRC for his technical advice, and Kayo Yasuda of Tokai University, Youko  
10 Yasutomi of Tokushima University, Kyoko Takada, and Kaoru Yoshitaka of Tokyo University of Agriculture  
11 for their technical assistance. This work was supported by grants from the Japanese Ministry of Education,  
12 Culture, Sports, Science and Technology.

13

## 14 **References**

- 15 1. Miyamoto S, Murota, K, Terao, J. High oxidizability of large intestinal mucosa in iron ion-induced lipid  
16 peroxidation. In: Yoshikawa T, editor. Oxidative stress and digestive diseases. Basel: Karger; 2001. pp. 103-  
17 113.
- 18
- 19 2. de Moreno de LeBlanc A, LeBlanc JG, Perdigón G, Miyoshi A, Langella, P, Azevedo V, et al. Oral

- 1 administration of a catalase-producing *Lactococcus lactis* can prevent a chemically induced colon cancer in  
2 mice. J Medical Microbiol. 2008; 57: 100-105.
- 3
- 4 3. Evans MV, Turton HE, Grant CM, Dawes IW. Toxicity of linoleic acid hydroperoxide to *Saccharomyces*  
5 *cerevisiae*: Involvement of a respiration-related process for maximal sensitivity and adaptive response. J  
6 Bacteriol. 1998; 180: 483-490.
- 7
- 8 4. Yoshikawa T, Ueda S, Naito Y, Takahashi S, Oyamada H, Morita Y, et al. Role of oxygen-derived free  
9 radicals in gastric mucosal injury induced by ischemia or ischemia-reperfusion in rats. Free Radic Res  
10 Commun. 1993; 7: 285-291.
- 11
- 12 5. Naito Y, Yoshikawa Y, Tanigawa T, Sakurai K, Yamasaki K, Uchida M, et al. Hydroxyl radical scavenging  
13 by rebamipide and related compounds: electron paramagnetic resonance study. Free Radic Biol Med. 1995;  
14 18: 117-123.
- 15
- 16 6. Muller A, Cadenas E, Graf P, Sies H. A novel biologically active seleno-organic compound-I. Glutathione  
17 peroxidase-like activity *in vitro* and antioxidant capacity of PZ 51 (Ebselen). Biochem Pharmacol. 1984; 33:  
18 3235-3239.
- 19

- 1 7. Ito M, Ohishi K, Yoshida Y, Yokoi W, Sawada H. Antioxidative Effects of Lactic Acid Bacteria on the  
2 Colonic Mucosa of Iron-Overloaded Mice. *J Agric Food Chem.* 2003; 51: 15 4456-4460.  
3
- 4 8. Watanabe A, Kaneko C, Hamada Y, Takeda K, Kimata S, Matsumoto T, et al. Isolation of lactic acid bacteria  
5 exhibiting high scavenging activity for environmental hydrogen peroxide from fermented foods and its two  
6 scavenging enzymes for hydrogen peroxide. *J Gen Appl Microbiol.* 2016; 62: 75-82.  
7
- 8 9. Adachi H, Fujiwara Y, Ishii N. Effects of oxygen on protein carbonyl and aging in *Caenorhabditis elegans*  
9 mutants with long (*age-1*) and short (*mev-1*) life spans. *J Gerontol A Biol Sci Med Sci.* 1998; 53: B240-  
10 B244.  
11
- 12 10. Yamaguchi T, Onodera A, Yasuda K, Nishio Y, Arai M, Tsuda M, et al. A low cost and quick assay system  
13 using the free-living nematode *Caenorhabditis elegans* to determine the effects of Kampo medicines on life  
14 span. *AATEX.* 2008; 13: 1-10.  
15
- 16 11. Takanori I, Yasui C, Hoshino K, Arikawa K, Yoshikazu N. Influence of lactic acid bacteria on longevity of  
17 *Caenorhabditis elegans* and host defense against *Salmonella enterica* serovar enteritidis. *Appl Environ*  
18 *Microbiol.* 2007; 73: 6404-6409.  
19

- 1 12. Uchimura T, Okada S. III. Identification of lactic acid bacteria. In: Kozaki M, editor. Manual of lactic acid  
2 bacteria. Tokyo: Asakura Shoten; 1992. pp. 21-73.  
3
- 4 13. Funk MO, Isaac R, Porter NA. Preparation and purification of lipid hydroperoxides from arachidonic and  $\gamma$ -  
5 linolenic acids. *Lipids*. 1976; 11: 113-116.  
6
- 7 14. Mihaljević B, Katušin-Ražem B, Ražem D. The reevaluation of the ferric thiocyanate assay for lipid  
8 hydroperoxides with special considerations of the mechanistic aspects of the response. *Free Radic Biol Med*.  
9 1996; 21: 153-163.  
10
- 11 15. Ishii N, Takahashi K, Tomita S, Keino T, Honda S, Yoshino K, et al. A methyl viologen-sensitive mutant  
12 of the nematode *Caenorhabditis elegans*. *Mutat Res*. 1990; 237: 165-171.  
13
- 14 16. Hosokawa H, Ishii N, Ishida H, Ichimori K, Nakazawa H, Suzuki K. Rapid accumulation of fluorescent  
15 material with aging in an oxygen- sensitive mutant *mev-1* of *Caenorhabditis elegans*. *Mech Ageing Dev*.  
16 1994; 74: 162-170.  
17
- 18 17. Brenner S. The genetics of *Caenorhabditis elegans*. *Genetics*. 1974; 77: 71-94.  
19

- 1 18. Stiernagle T. Maintenance of *C. elegans*. Pasadena: WormBook; 2006.
- 2 <https://www.ncbi.nlm.nih.gov/books/NBK19662/>
- 3
- 4 19. Mihara M, Uchiyama M. Determination of malonaldehyde precursor in tissues by thiobarbituric acid test.
- 5 Anal Biochem. 1978; 86: 271-278.
- 6
- 7 20. Bacon BR, Tavill AS, Brittenham AS, Park CH, Recknagel RO. Hepatic lipid peroxidation in vivo in rats
- 8 with chronic iron overload. J Clin Invest. 1983; 71: 429-439.
- 9
- 10 21. Murakami A, Kishimoto M, Kawaguchi M, Matsuura K, Ichikawa T. Lipid peroxides and their relatives in
- 11 organs of female rats fed diets containing excessive heme iron. J Jpn Soc Nutr Food Sci. 1998; 51: 9-15.
- 12
- 13 22. Erichsen K, Ulvik RJ, Grimstad T, Berstad A, Berge RK, Hausken T. Effects of ferrous sulphate and non-
- 14 ionic iron-polymaltose complex on markers of oxidative tissue damage in patients with inflammatory bowel
- 15 disease. Bowel Dis. 2005; 11: 744-748.
- 16
- 17 23. Ito M, Sawada H, Ohishi K, Yoshida Y, Yokoi W, Watanabe T, et al. Suppressive effects of bifidobacteria
- 18 on lipid peroxidation in the colonic mucosa of iron-overloaded mice. J Dairy Sci. 2001; 84: 1583-1589.
- 19

- 1 24. Younes M, Trepkau HD, Siegers CP. Enhancement by dietary iron of lipid peroxidation in mouse colon.  
2 Res Commun Chem Pathol Pharmacol. 1990; 70: 349-354.  
3
- 4 25. Tang W, Li C, He Z, Pan F, Pan S, Wang Y. Probiotic Properties and Cellular Antioxidant Activity of  
5 *Lactobacillus plantarum* MA2 Isolated from Tibetan Kefir Grains. Probiotics & Antimicro Prot. 2018; 10:  
6 523-533.  
7
- 8 26. Ahotupa M, Saxelin M, Korpela R. Antioxidative properties of *Lactobacillus* GG. Nutr Today. 1996; 31:  
9 51S.  
10
- 11 27. Lin MY, Chang FJ. Antioxidative effect of intestinal bacteria *Bifidobacterium longum* ATCC 15708 and  
12 *Lactobacillus acidophilus* ATCC 4356. Digest Dis Sci. 2000; 45: 1617-1622.  
13
- 14 28. Das D, Goyal A. Antioxidant activity and  $\gamma$ -aminobutyric acid (GABA) producing ability of probiotic  
15 *Lactobacillus plantarum* DM5 isolated from Marcha of Sikkim. LWT Food Sci Technol. 2015; 61: 263-  
16 268.  
17
- 18 29. Tang W, Xing ZQ, Li C, Wang JJ, Wang YP. Molecular mechanisms and in vitro antioxidant effects of  
19 *Lactobacillus plantarum* MA2. Food Chem. 2016; 221: 1642-1649.

1

2 30. Tang W, Xing ZQ, Hu W, Li C, Wang JJ, Wang YP. Antioxidative effects in vivo and colonization of  
3 *Lactobacillus plantarum* MA2 in the murine intestinal tract. Appl Microbiol Biotechnol. 2016; 100: 7193-  
4 7202.

5

## 6 **Figure legends**

7 **Fig 1. The distribution of eliminating activities for cumene and linoleic hydroperoxide in lactic acid**  
8 **bacteria and the difference in their capacities.**

9 (A) Twenty lactic acid bacterial strains and typical bacterial species were cultured under specific conditions  
10 described in the Materials and Methods section. Each living cell was exposed to various concentrations of cumene  
11 hydroperoxide at 0.3, 1.0, and 3.0 mM for 1.5 h. After treatment, the extent of decomposition of the  
12 hydroperoxide was calculated as their eliminating activity by the difference of the initial concentration and the  
13 remaining concentration in the culture medium. The bar graph represents the mean values from three independent  
14 experiments, and error bars indicate the standard deviation (SD). (B) The same twenty lactic acid bacterial strains  
15 and typical bacterial species as (A) were cultured under specific conditions described in the Materials and  
16 Methods section. Each living cell was exposed to various concentrations of linoleic acid hydroperoxide at 0.25,  
17 0.5, and 1.0 mM for 1.5 h at 37°C. After treatment, the extent of decomposition of the hydroperoxide was  
18 calculated as (A).

19



1 **Fig 2. Relationship between the eliminating activity and survival rate of lactic acid bacteria in the presence**  
2 **of cumene or linoleic acid hydroperoxide.**

3 (A) Bacterial cells were incubated with various concentrations of cumene hydroperoxide from 0.3 to 3 mM for  
4 1.5 h. After treatment, the cells were diluted and plated, and then the developed colonies were defined as living  
5 cells. The eliminating activity for substrate was estimated as described in Figure 1. The relationship between the  
6 number of living cells (lines) and the eliminating activity for hydroperoxide (bars) were plotted in each case. The  
7 data are mean values of three independent experiments. (a) *L. plantarum* NRIC 1067<sup>T</sup> and *L. plantarum* P1-2  
8 strain (b) *E. coli* NRIC1518, *P. pentosaceus* NRIC 0099<sup>T</sup>, and *P. pentosaceus* Be1 strain, (c) *L. acidophilus* NRIC  
9 1547<sup>T</sup>, *S. thermophilus* NRIC 0256<sup>T</sup> and *B. subtilis* NRIC 1015. (B) The same bacterial cells as (A) were  
10 incubated with various concentrations of linoleic acid hydroperoxide from 0.25 to 1 mM for 1.5 h at 37°C. After  
11 treatment, the cells were diluted and plated, and then the developed colonies were defined as living cells. The  
12 eliminating activity for substrate was estimated as described in (A). (a) *L. plantarum* NRIC 1067<sup>T</sup> and *L.*  
13 *plantarum* P1-2 strain (b) *E. coli* NRIC1518, *P. pentosaceus* NRIC 0099<sup>T</sup>, and *P. pentosaceus* Be1 strain, (c) *L.*  
14 *acidophilus* NRIC 1547<sup>T</sup>, *S. thermophilus* NRIC 0256<sup>T</sup> and *B. subtilis* NRIC 1015.

15

16 **Fig 3. *Lactobacillus plantarum* P1-2 reduces cumene and linoleic acid hydroperoxide to the corresponding**  
17 **hydroxyls.**

18 (A) *L. plantarum* P1-2 was aerobically cultured in GYP medium, and the cells were incubated in 50 mM sodium  
19 phosphate (pH 7) containing 25 mM glucose and 3 mM cumene hydroperoxide for 1.5 h at 37°C. After the

1 reaction, each metabolite was analyzed by HPLC equipped with an ODS column. Cumene hydroperoxide and  
2 the corresponding alcohol (2-phenyl-2-propanol) were eluted at retention times of 19 and 13 min, respectively.  
3 (B) *L. plantarum* P1-2 was aerobically cultured in GYP medium, and the cells were incubated in 50 mM sodium  
4 phosphate (pH 7) containing 25 mM glucose 3 mM 13-HpODE (2) for 3 h at 37°C. 13-HpODE was used as the  
5 stable substrate of linoleic acid hydroperoxide. After the reaction, each metabolite was analyzed by HPLC  
6 equipped with an ODS column. 13-HpODE and the corresponding hydroxyl (13-HODE) were eluted with  
7 retention times of 19 and 16 min, respectively.

8

9 **Fig 4. Prolongation of the lifespan of *C. elegans Afer-15;mev-1* with lactic acid bacteria.**

10 *E. coli* OP50 (gray), *S. thermophiles* NRIC0256T (green), *L. plantarum* P1-2 (red), and *P. pentosaceus* Be1 (blue)  
11 were administered to *C. elegans Afer-15;mev-1* at the growth stage L4. The mutants were hatched on pH stat  
12 GYP medium, and their lifespan was monitored until annihilation. Statistical analysis was carried out by Student's  
13 t-test and Tukey's multiple-range test. The least significant difference test was used for means separation at  $P <$   
14 0.05 within each strain. One hundred animals were measured for each strain at 25°C.

15

16 **Fig 5. Lipid peroxidation levels of plasma and tissues obtained from iron-overloaded rats.**

17 Lipid peroxidation in rats was induced by 0.5% iron fumarate (Fe), and the MDA level was measured in each  
18 organ. Data are expressed as the mean values  $\pm$  SD (n = 9). The asterisk (\*) indicates a statistical difference of  $P$   
19  $< 0.05$ .

1

2 **Fig 6. The effect of *Lactobacillus plantarum* P1-2 administration on the liver and colonic mucosa of iron-**  
3 **overloaded rats.**

4 *L. plantarum* P1-2 was administered to iron-overloaded rats, and the MDA levels in the liver and colonic mucosa  
5 were compared to those of the healthy (control), iron-overloaded rats (Fe). *S. thermophilus* NRIC0256<sup>T</sup> was also  
6 tested as the control strain. The data are the mean values  $\pm$  SD (n = 6), and the different letters indicate the  
7 statistical significance at  $P < 0.05$ .

8

## 9 **Supporting information**

10 **S1 Fig. Evaluation of the lifespan of *C. elegans*  $\Delta$ fer-15.**

11 *E. coli* OP50 (gray), *S. thermophiles* NRIC0256<sup>T</sup> (green), *L. plantarum* P1-2 (red), and *P. pentosaceus* Be1 (blue)  
12 were administered to *C. elegans*  $\Delta$ fer-15 when the growth stage reached L4. The mutants were hatched on pH  
13 stat GYP medium, and their lifespan was monitored until annihilation. Statistical analysis was carried out by  
14 Student's t-test and Tukey's multiple-range test. The least significant difference test was used for means  
15 separation at  $P < 0.05$  within each strain. One hundred animals were measured for each strain at 25°C.

16

17 **S2 Fig. Administration effect of *P. pentosaceus* Be1 strain exhibiting hydrogen peroxide eliminating**  
18 **activity on iron-overloaded rats: a colonic mucosal lipid peroxidation model.**

19 *P. pentosaceus* Be1 was administered to iron-overloaded rats, and the MDA levels in the colonic mucosa were

- 1 compared to those of the healthy (control) and iron-overloaded rats (Fe). *L. plantarum* P1-2 and *S. thermophilus*
- 2 NRIC0256<sup>T</sup> were also tested as the control strain. The data are the mean values  $\pm$  SD (n = 4).

**A**

Initial concentrations of cumene hydroperoxide

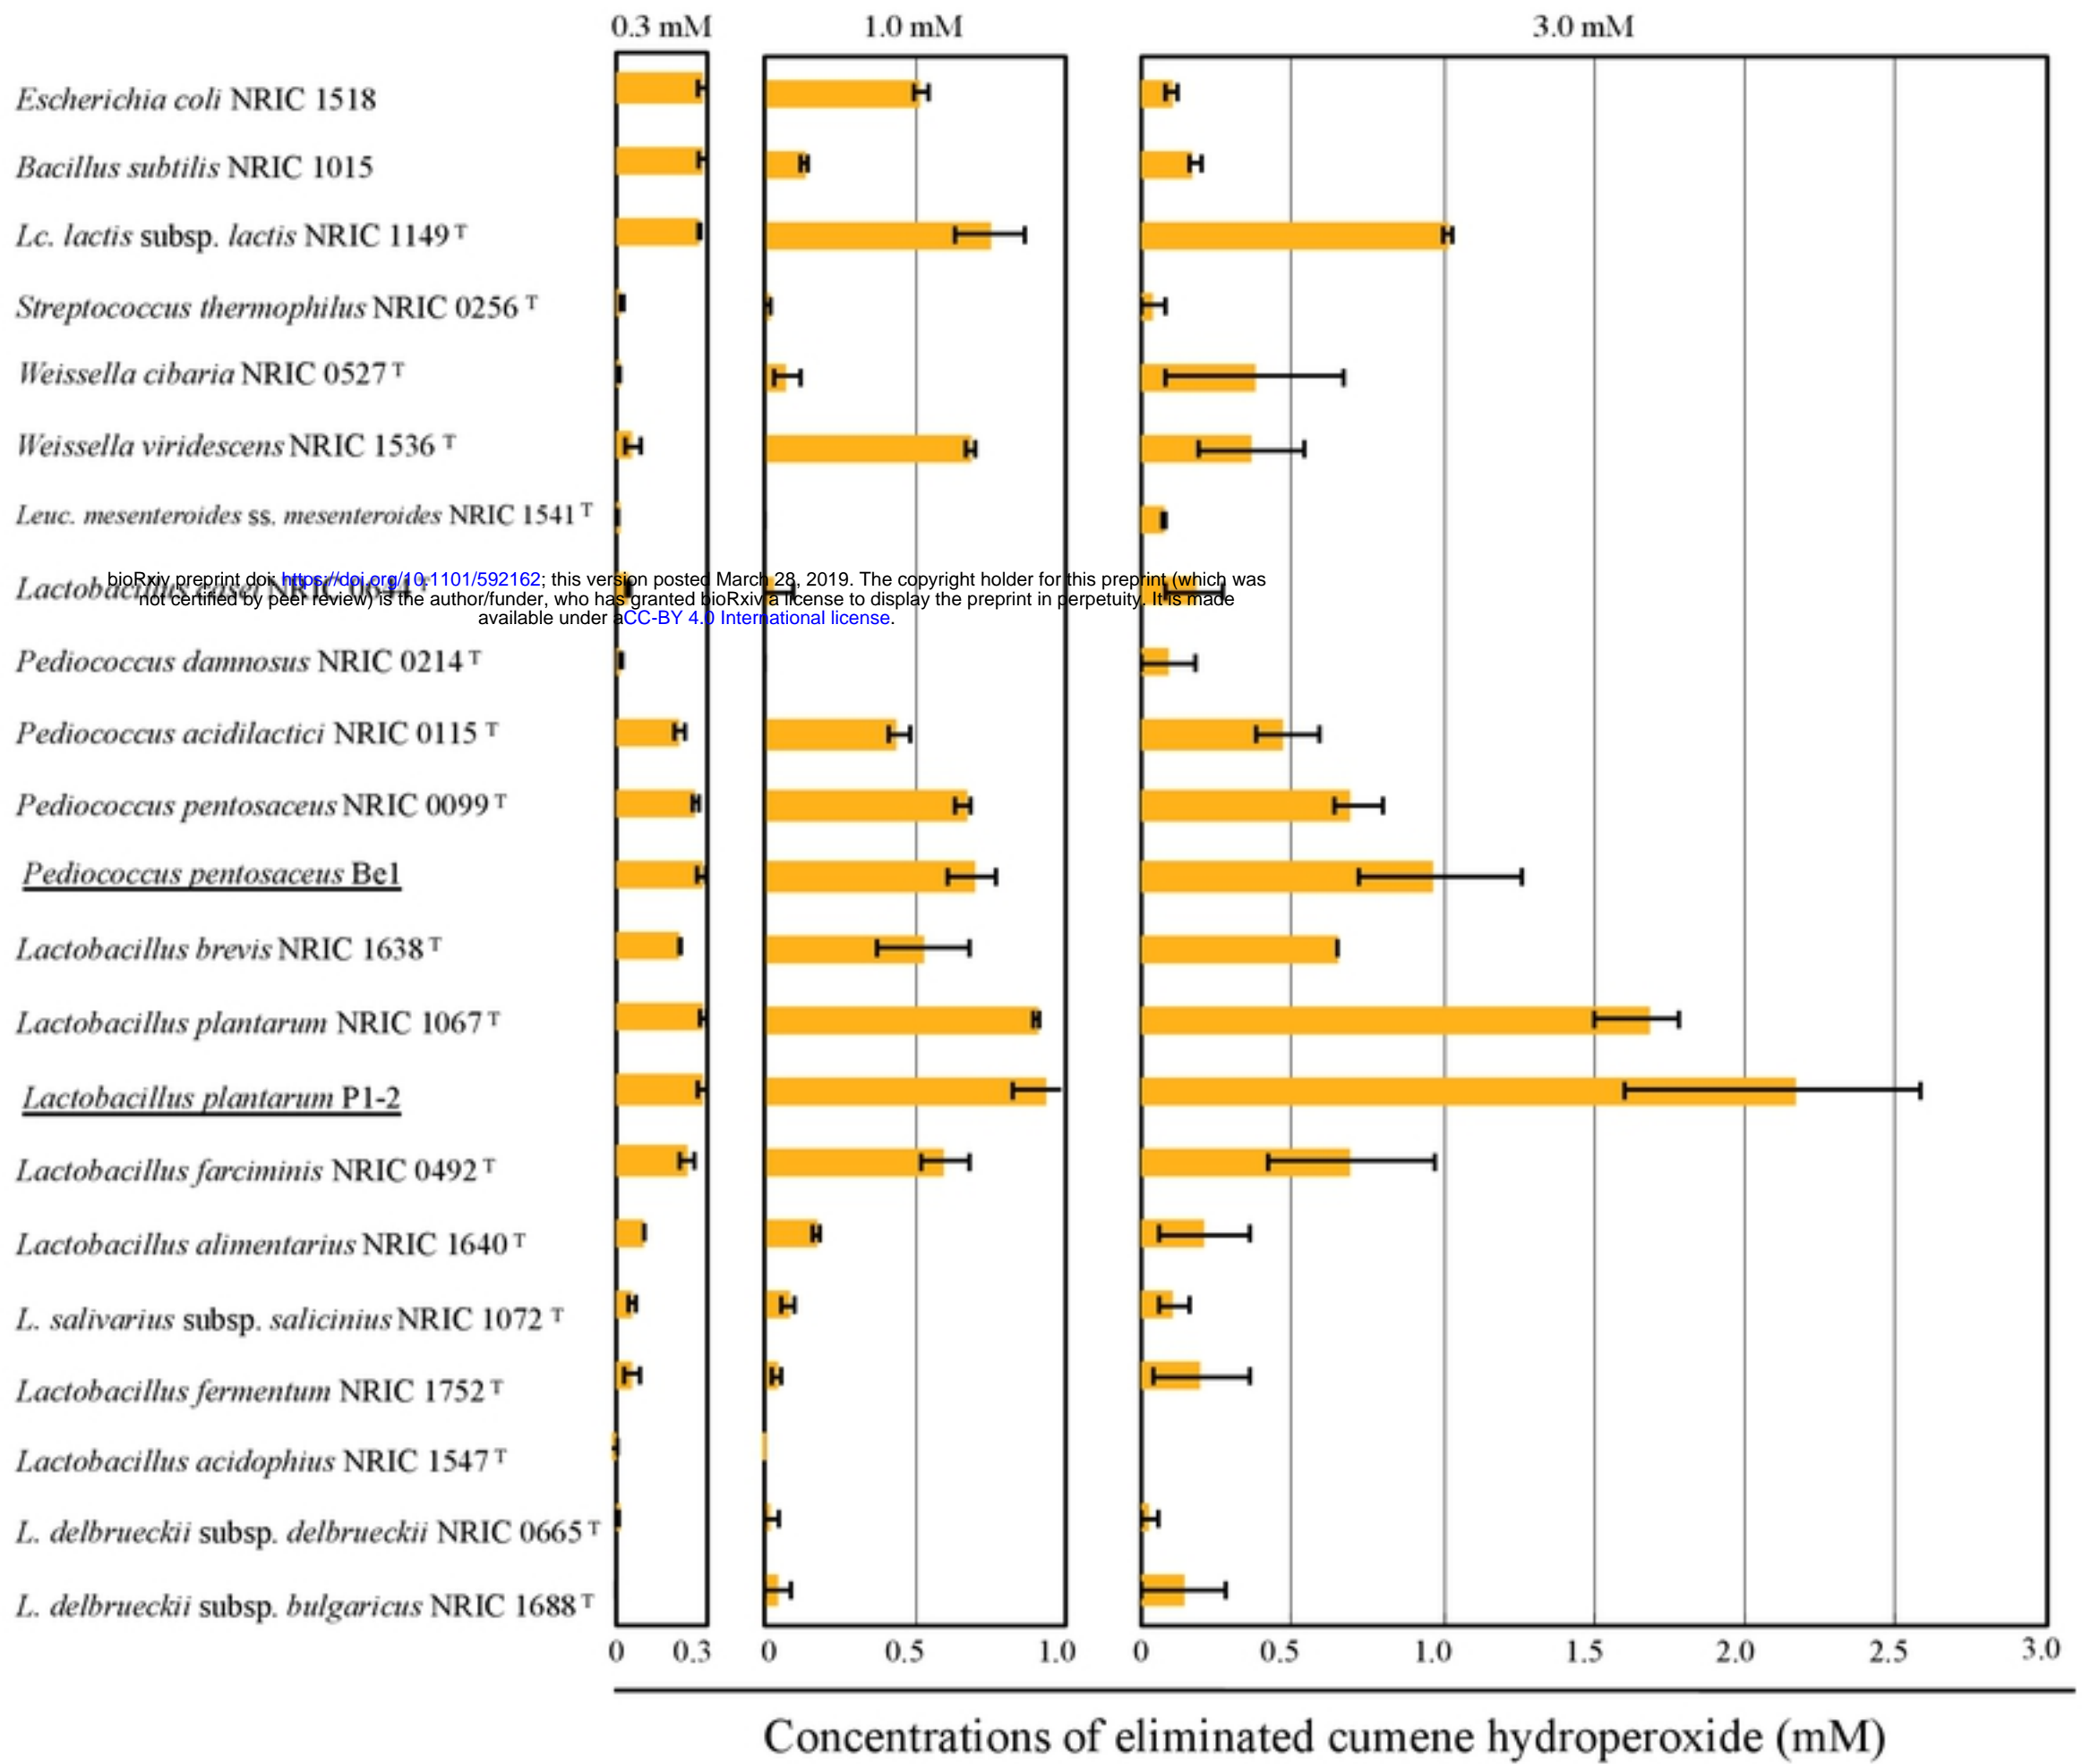

**Fig 1A. Cumene hydroperoxide-eliminating activity of lactic acid bacteria.**

**B**

## Initial concentrations of linoleic acid hydroperoxide

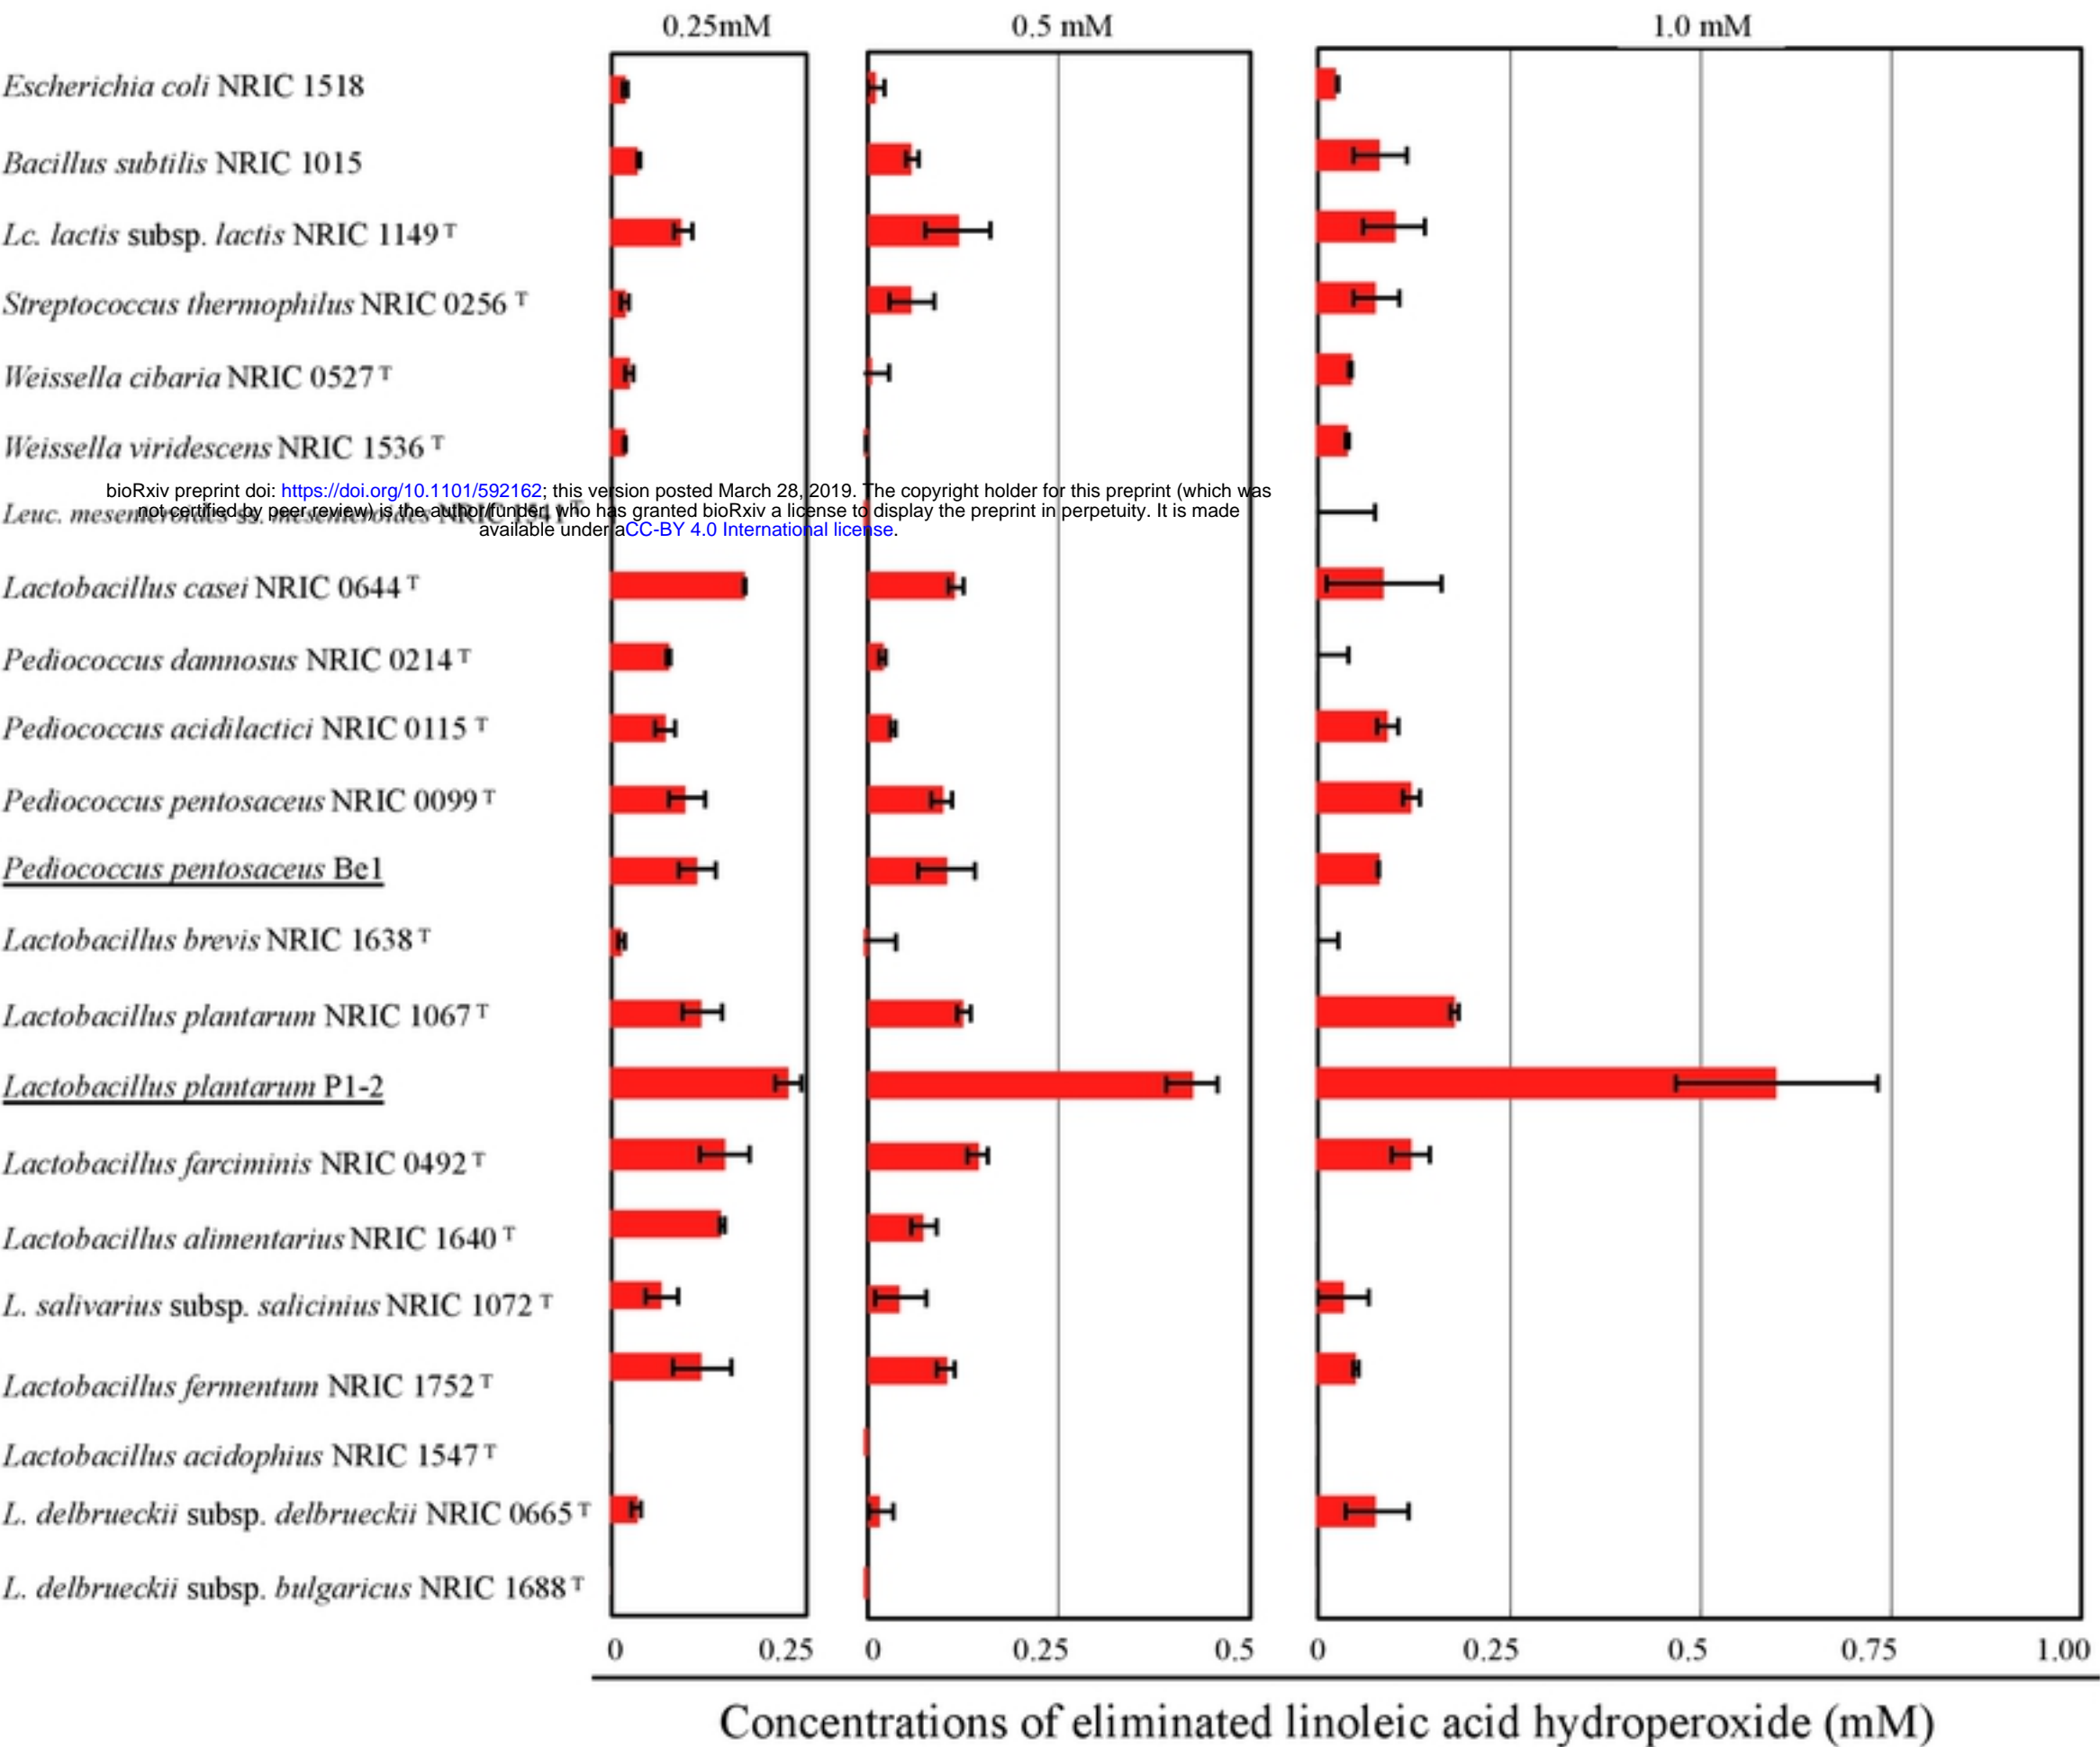**Fig 1B. Linoleic acid hydroperoxide-eliminating activity of lactic acid bacteria.**

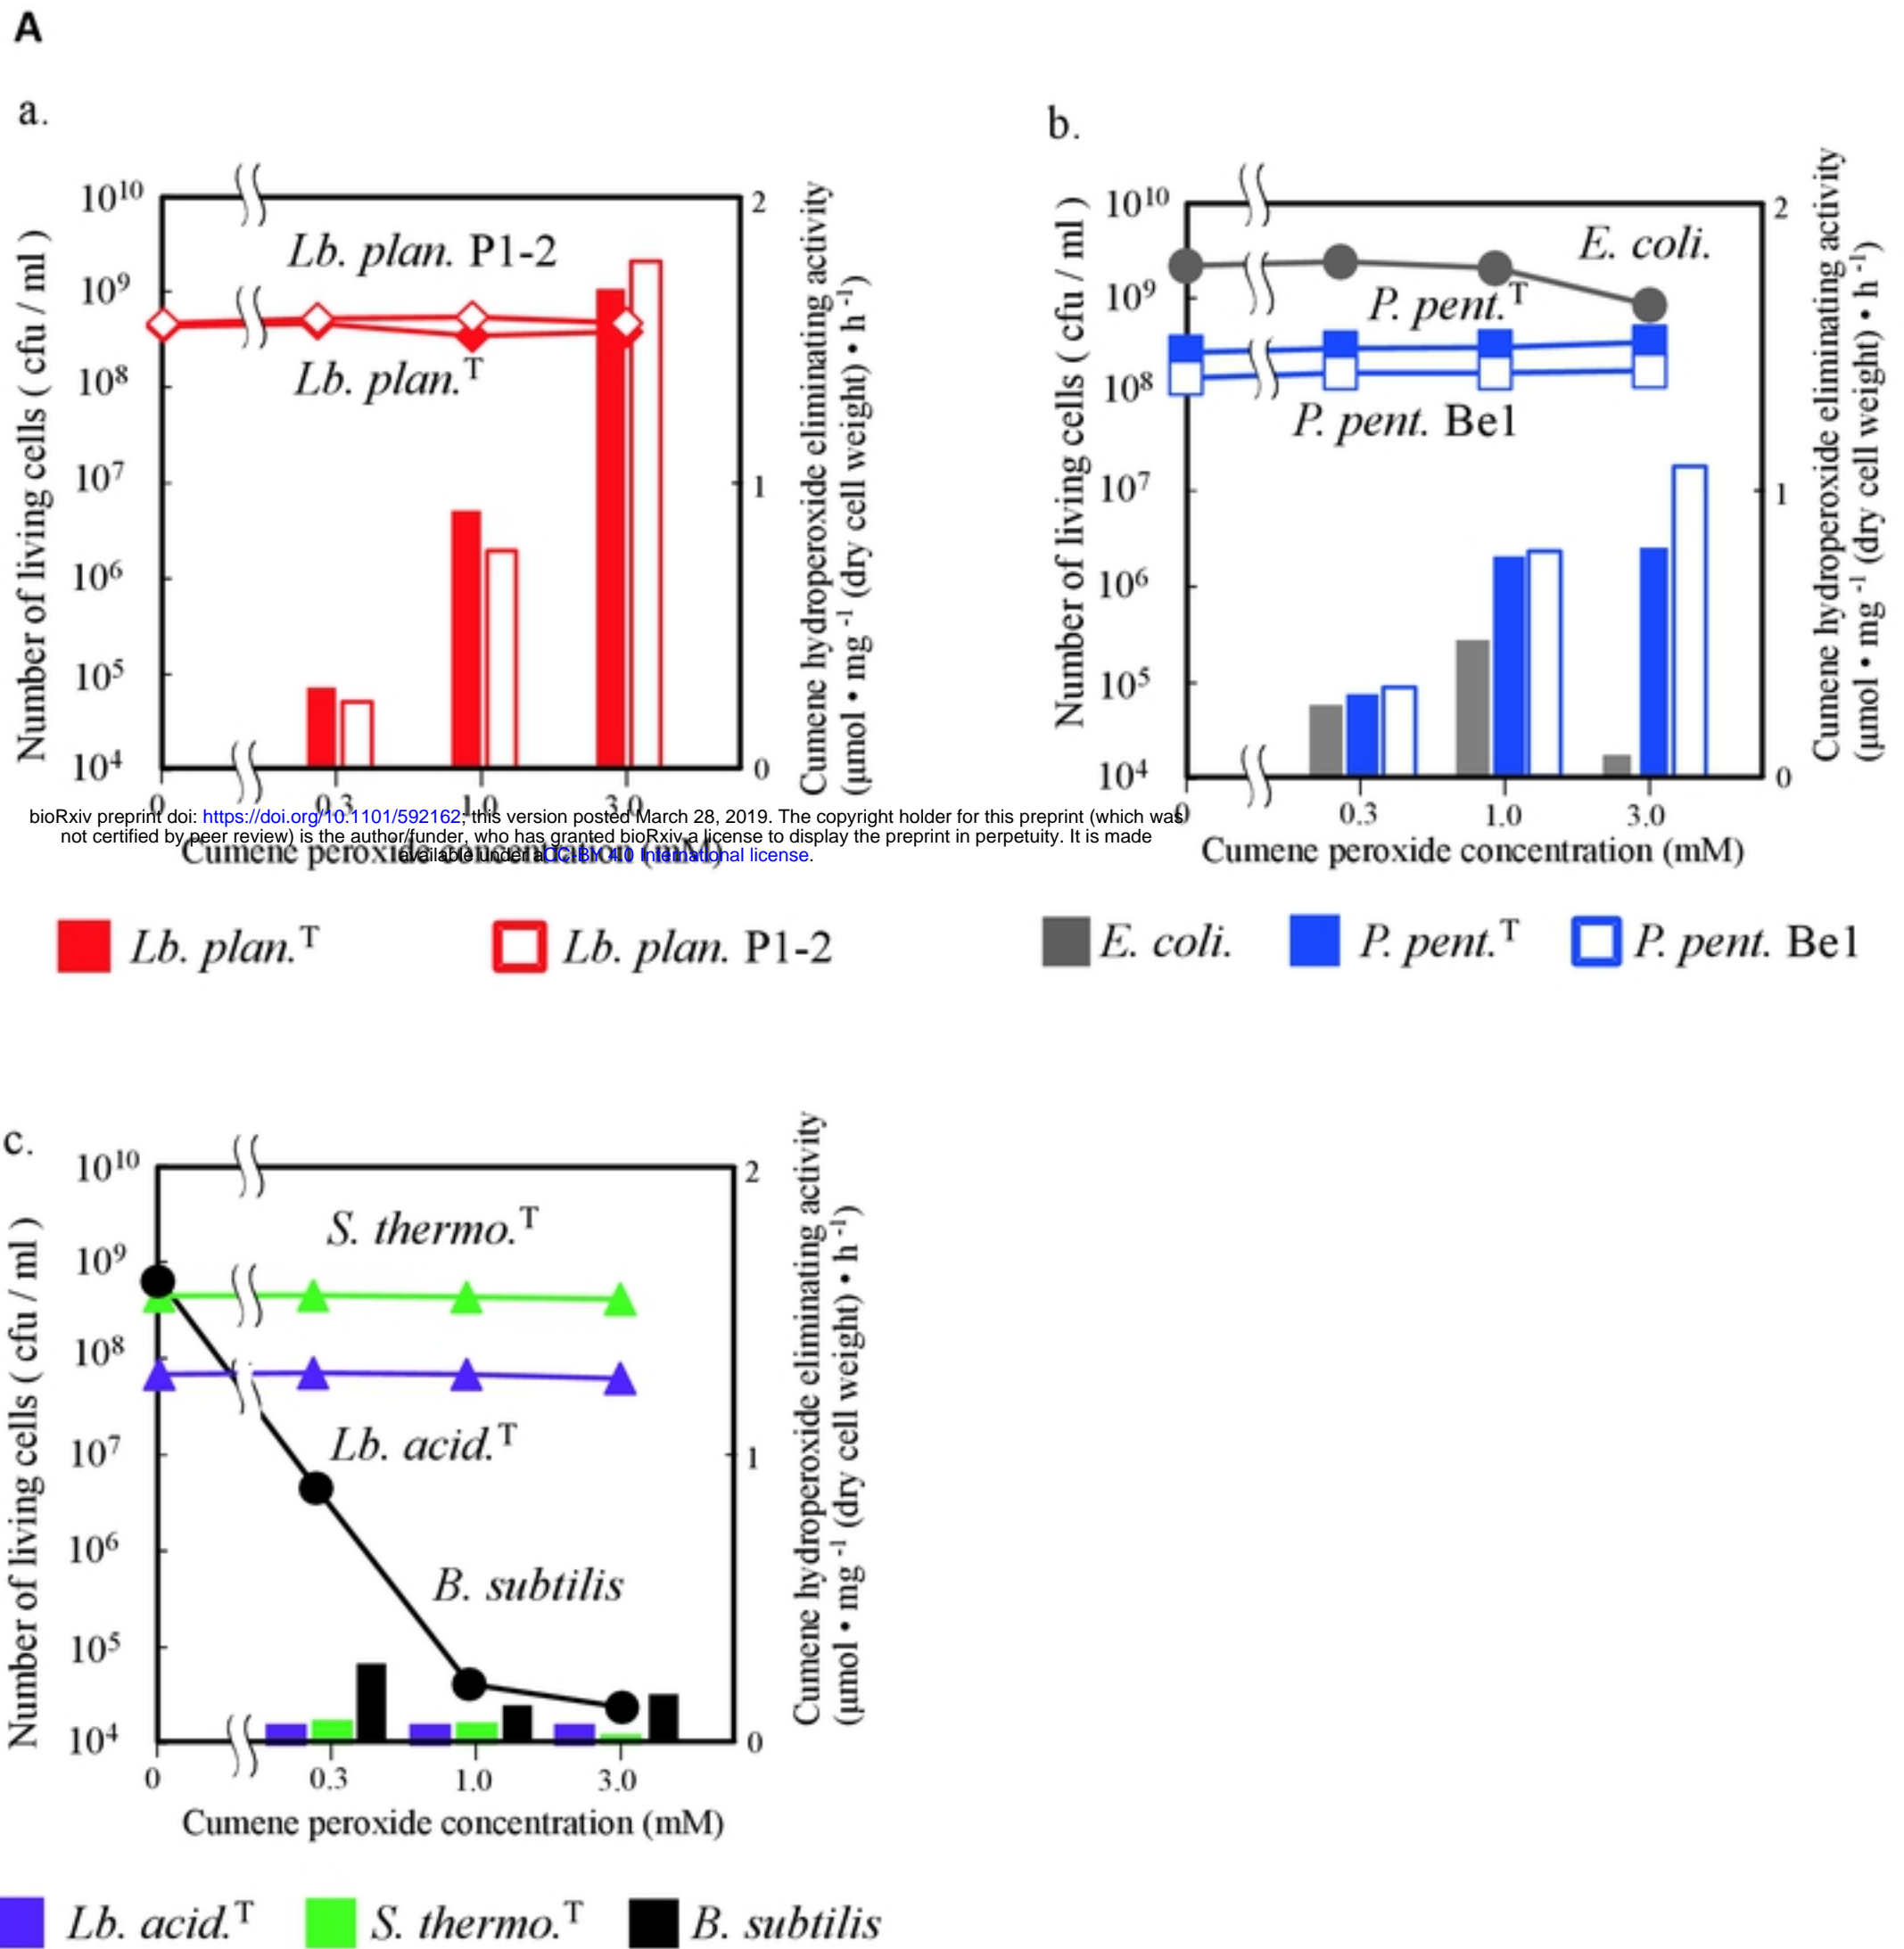

**Fig 2A. Relationship between cumene hydroperoxide-eliminating activity and survival rate of lactic acid bacteria in the presence of cumene hydroperoxide.**

**B**

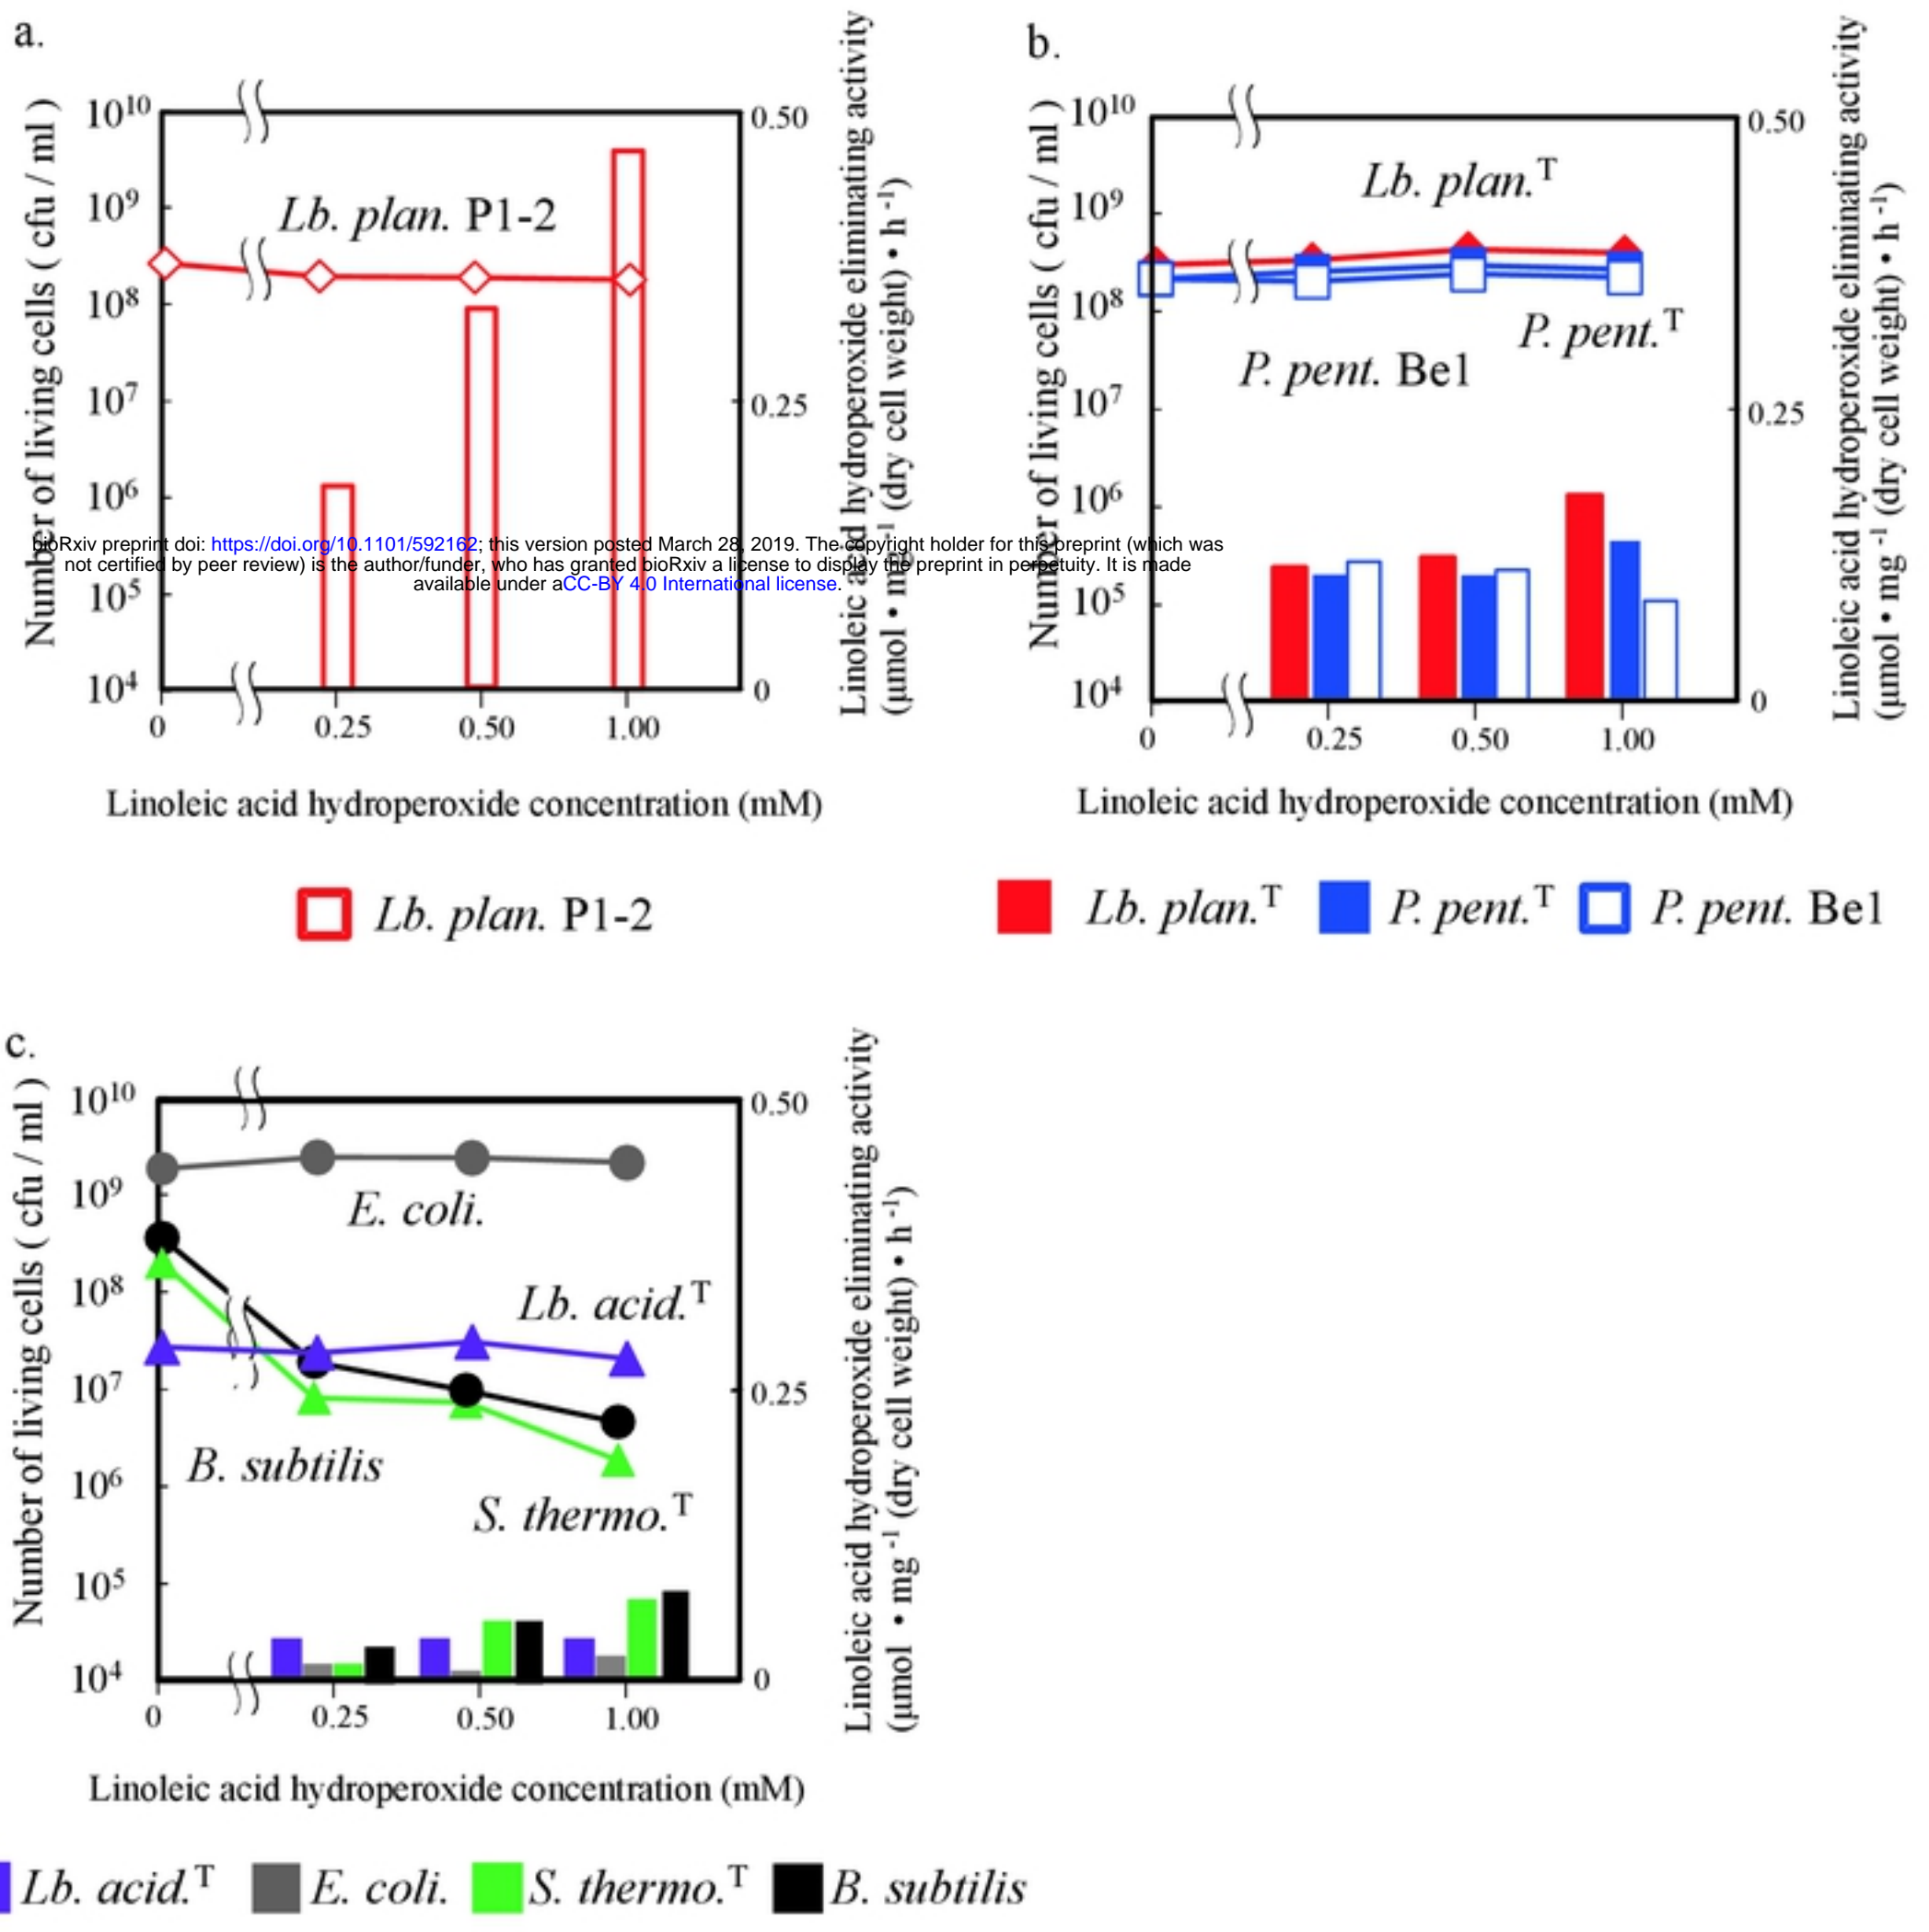

**Fig 2B. Relationship between linoleic acid hydroperoxide-eliminating activity and survival rate of lactic acid bacteria in the presence of linoleic acid hydroperoxide.**



A

*L. plantarum* P1

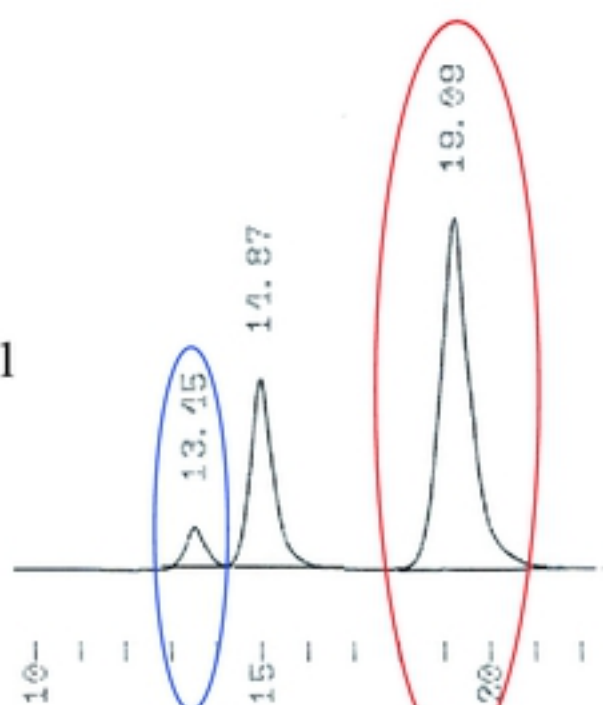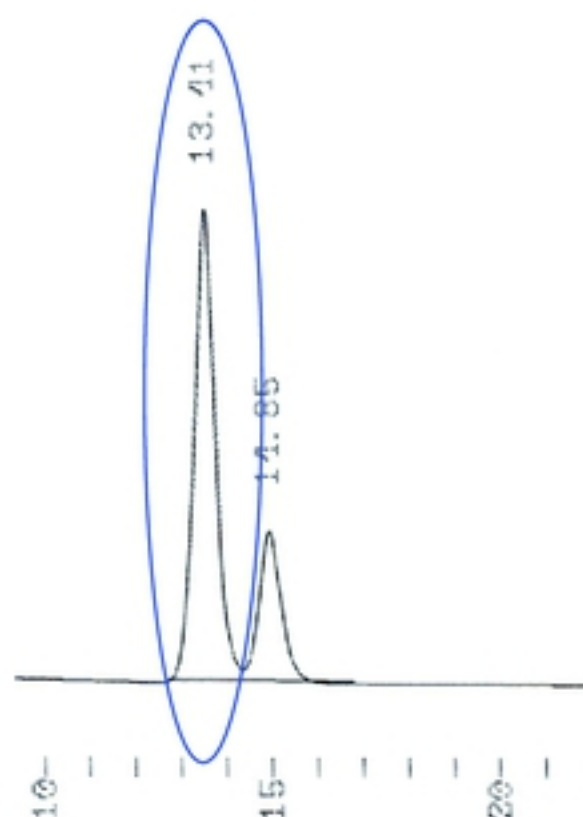

bioRxiv preprint doi: <https://doi.org/10.1101/592162>; this version posted March 28, 2019. The copyright holder for this preprint (which was not certified by peer review) is the author/funder, who has granted bioRxiv a license to display the preprint in perpetuity. It is made available under aCC-BY 4.0 International license.

Blank

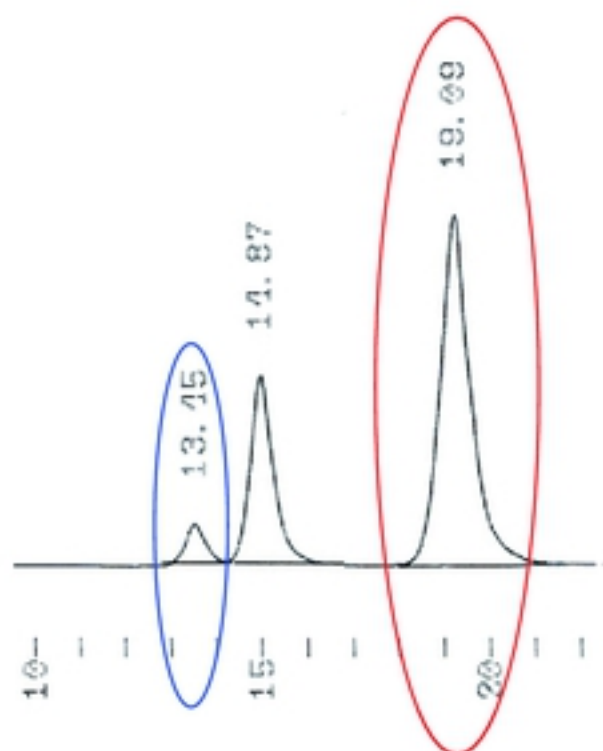

Before reaction

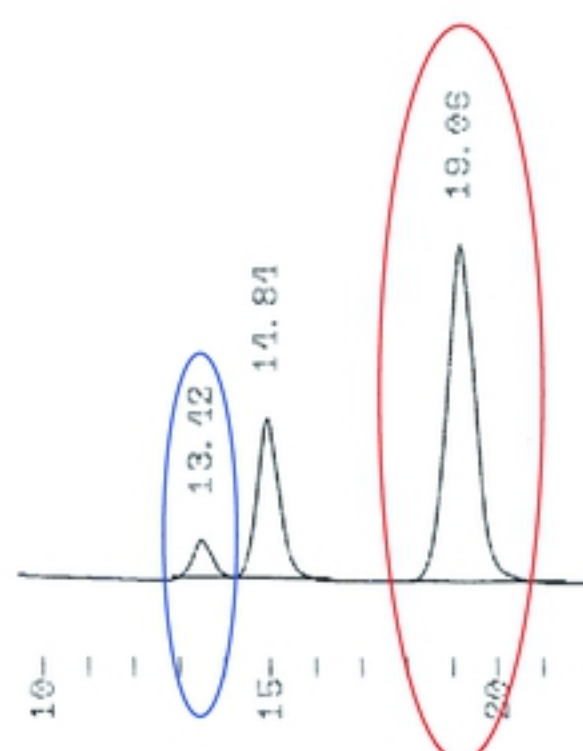

After reaction

○ : Cumene hydroperoxide

○ : 2-phenyl-2-propanol

**Fig 3A. The two-electron reduction of cumene hydroperoxide by *L. plantarum* P1-2.**

B

*L. plantarum* P1-2

bioRxiv preprint doi: <https://doi.org/10.1101/592162>; this version posted March 28, 2019. The copyright holder for this preprint (which was not certified by peer review) is the author/funder, who has granted bioRxiv a license to display the preprint in perpetuity. It is made available under aCC-BY 4.0 International license.

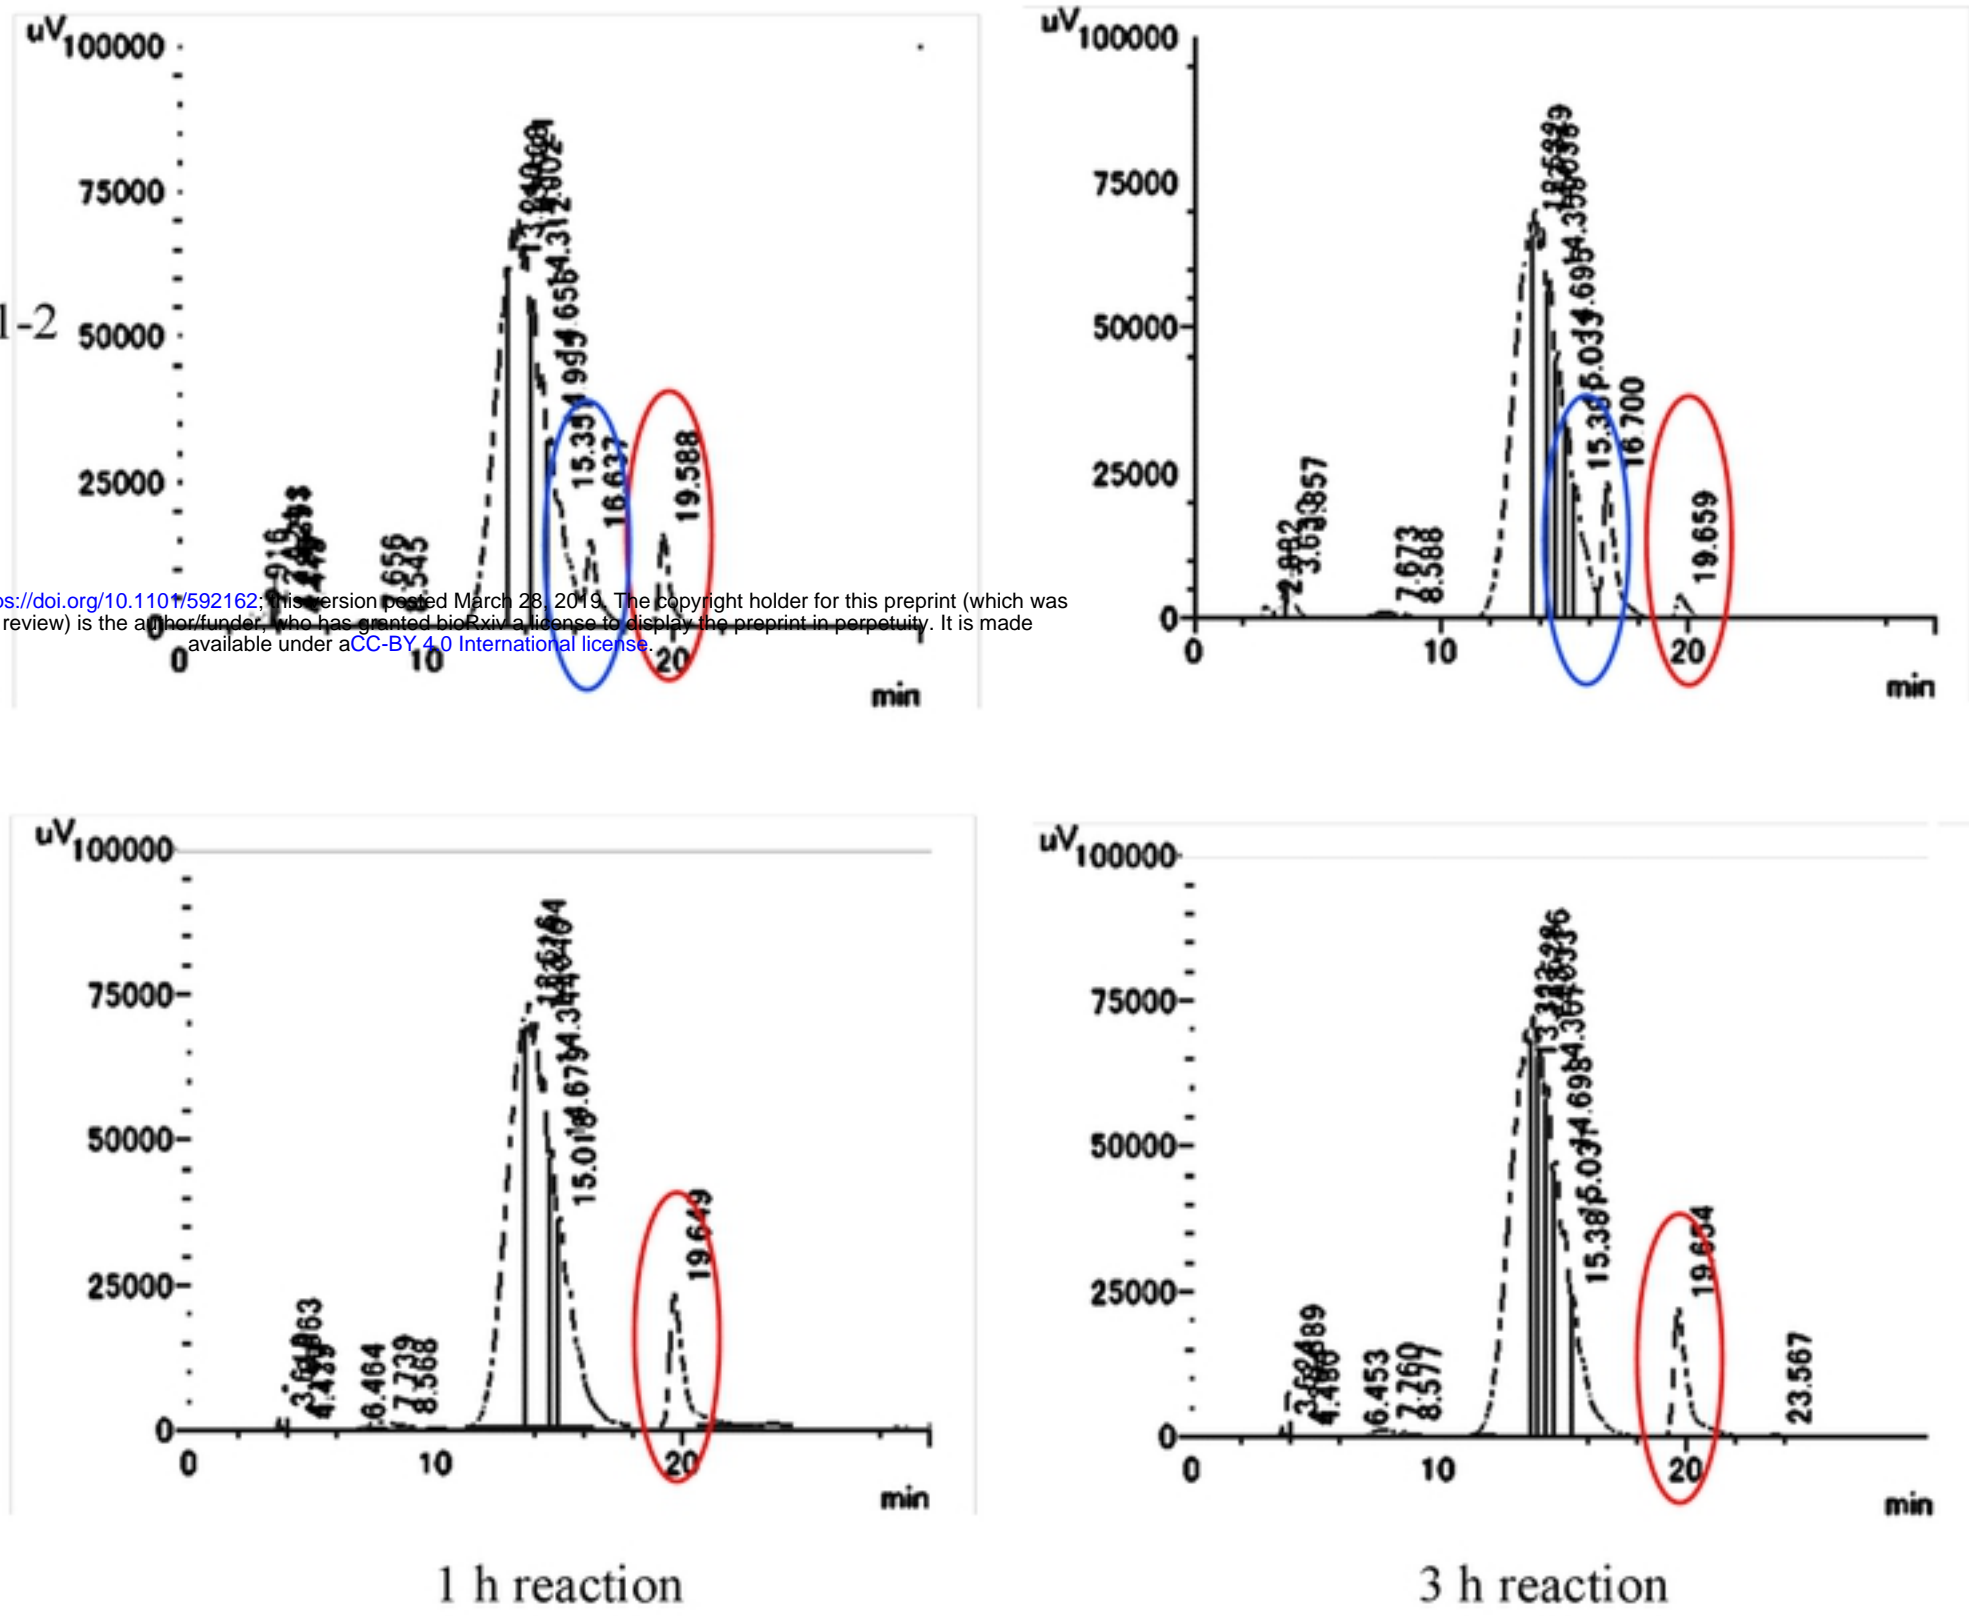

Fig 3B. The two-electron reduction of linoleic acid hydroperoxide by *L. plantarum* P1-2.

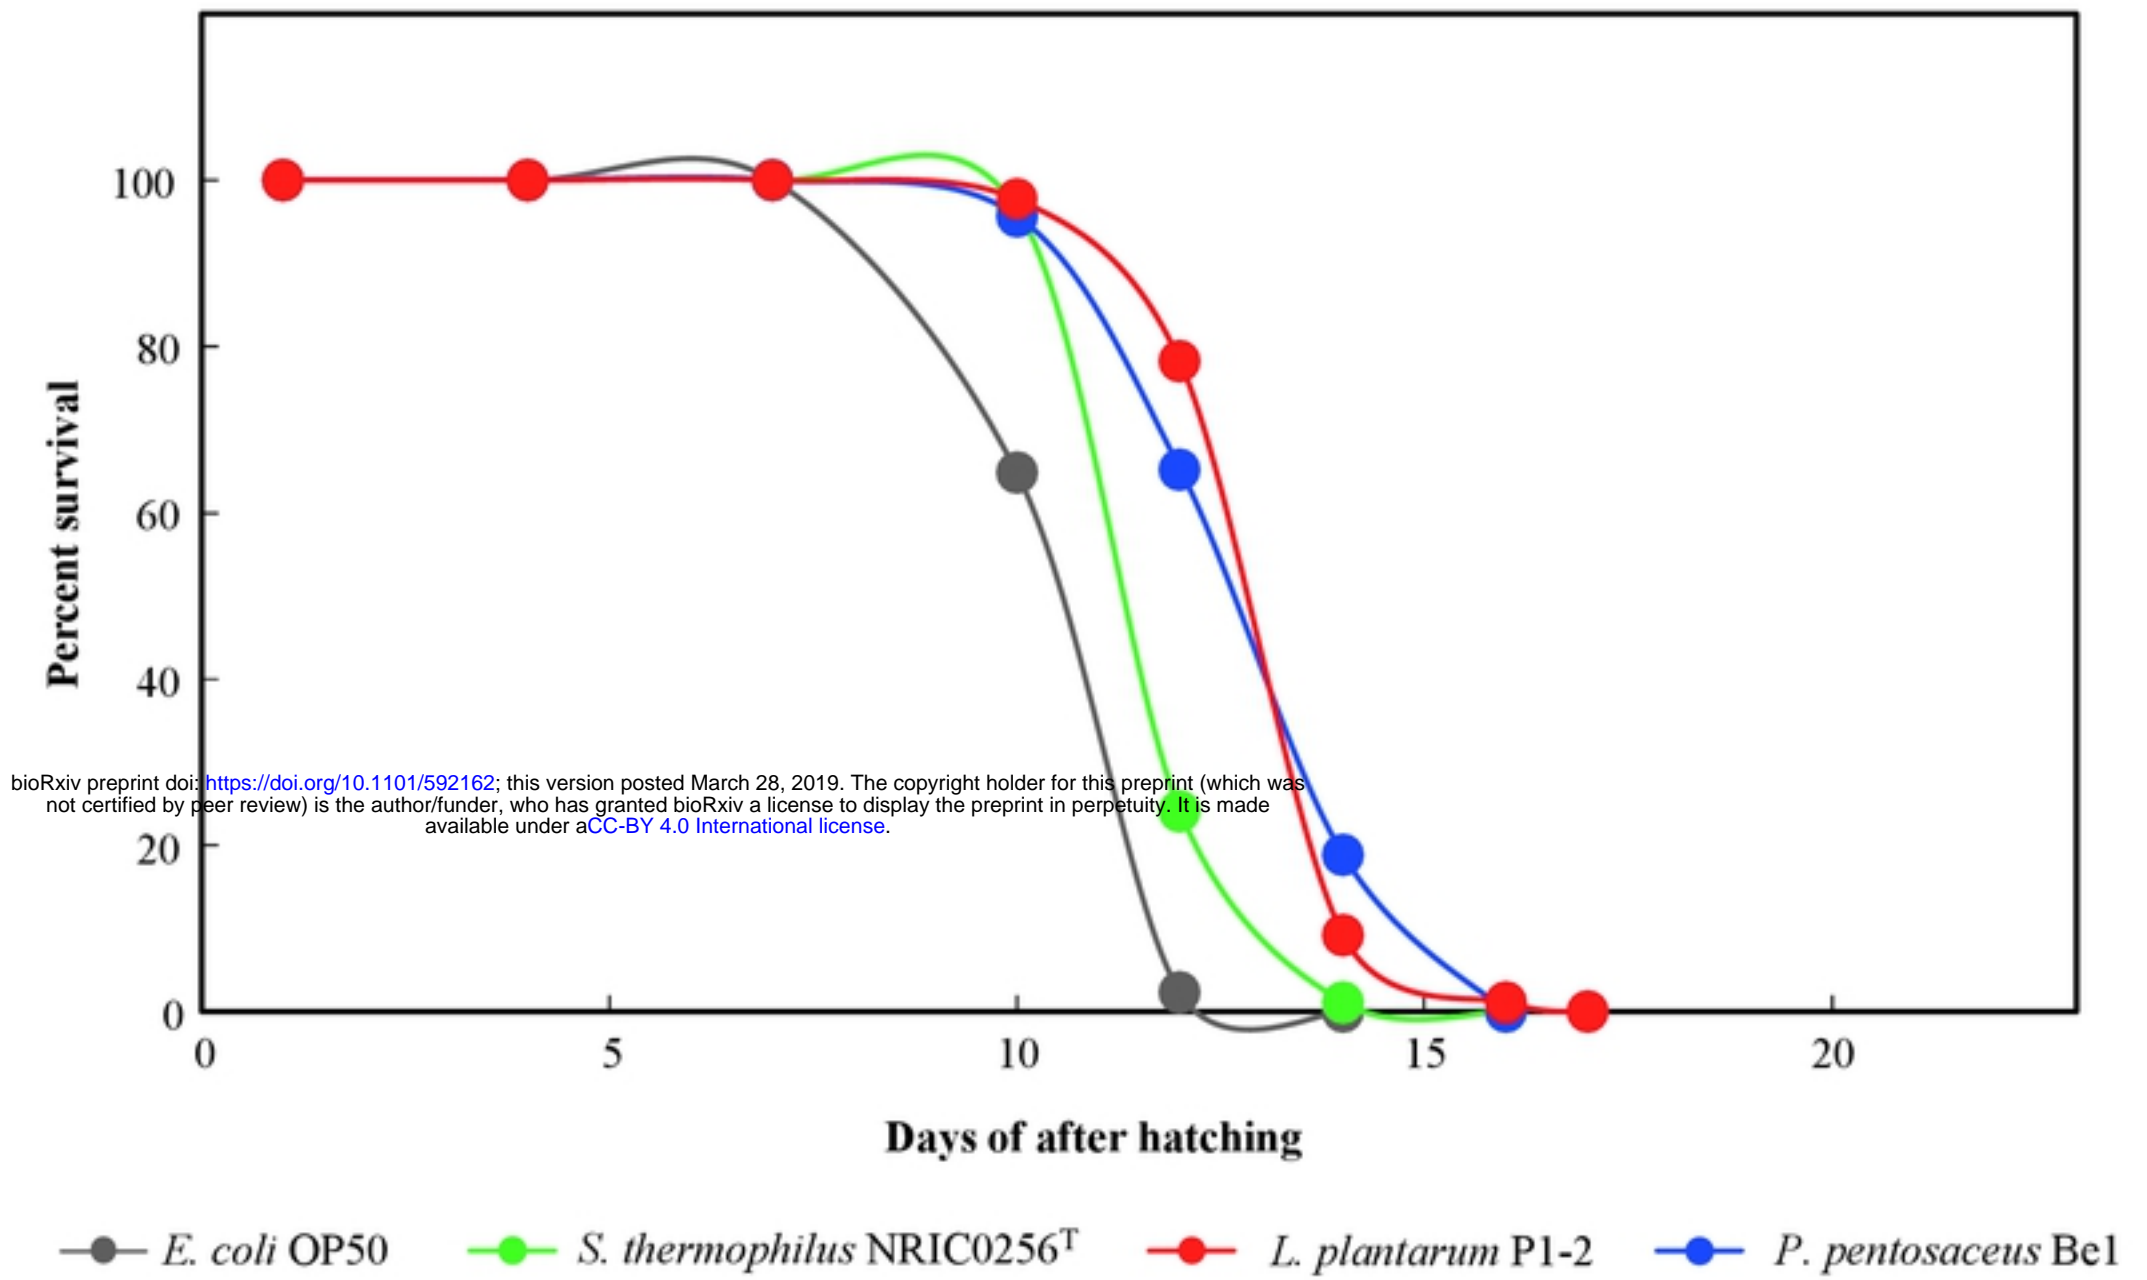

| Tested strains                               | <i>p</i> value | Compared strains                                 |
|----------------------------------------------|----------------|--------------------------------------------------|
| <i>S. thermophilus</i> NRIC0256 <sup>T</sup> | $p < 0.001$    | vs. <i>E. coli</i> OP50                          |
| <i>P. pentosaceus</i> Be1                    | $p < 0.001$    | vs. <i>S. thermophilus</i> NRIC0256 <sup>T</sup> |
| <i>L. plantarum</i> P1-2                     | $p < 0.001$    | vs. <i>S. thermophilus</i> NRIC0256 <sup>T</sup> |

**Fig 4. Prolongation of the lifespan of *C. elegans*  $\Delta fer-15; mev-1$  with Lactic acid bacteria.**

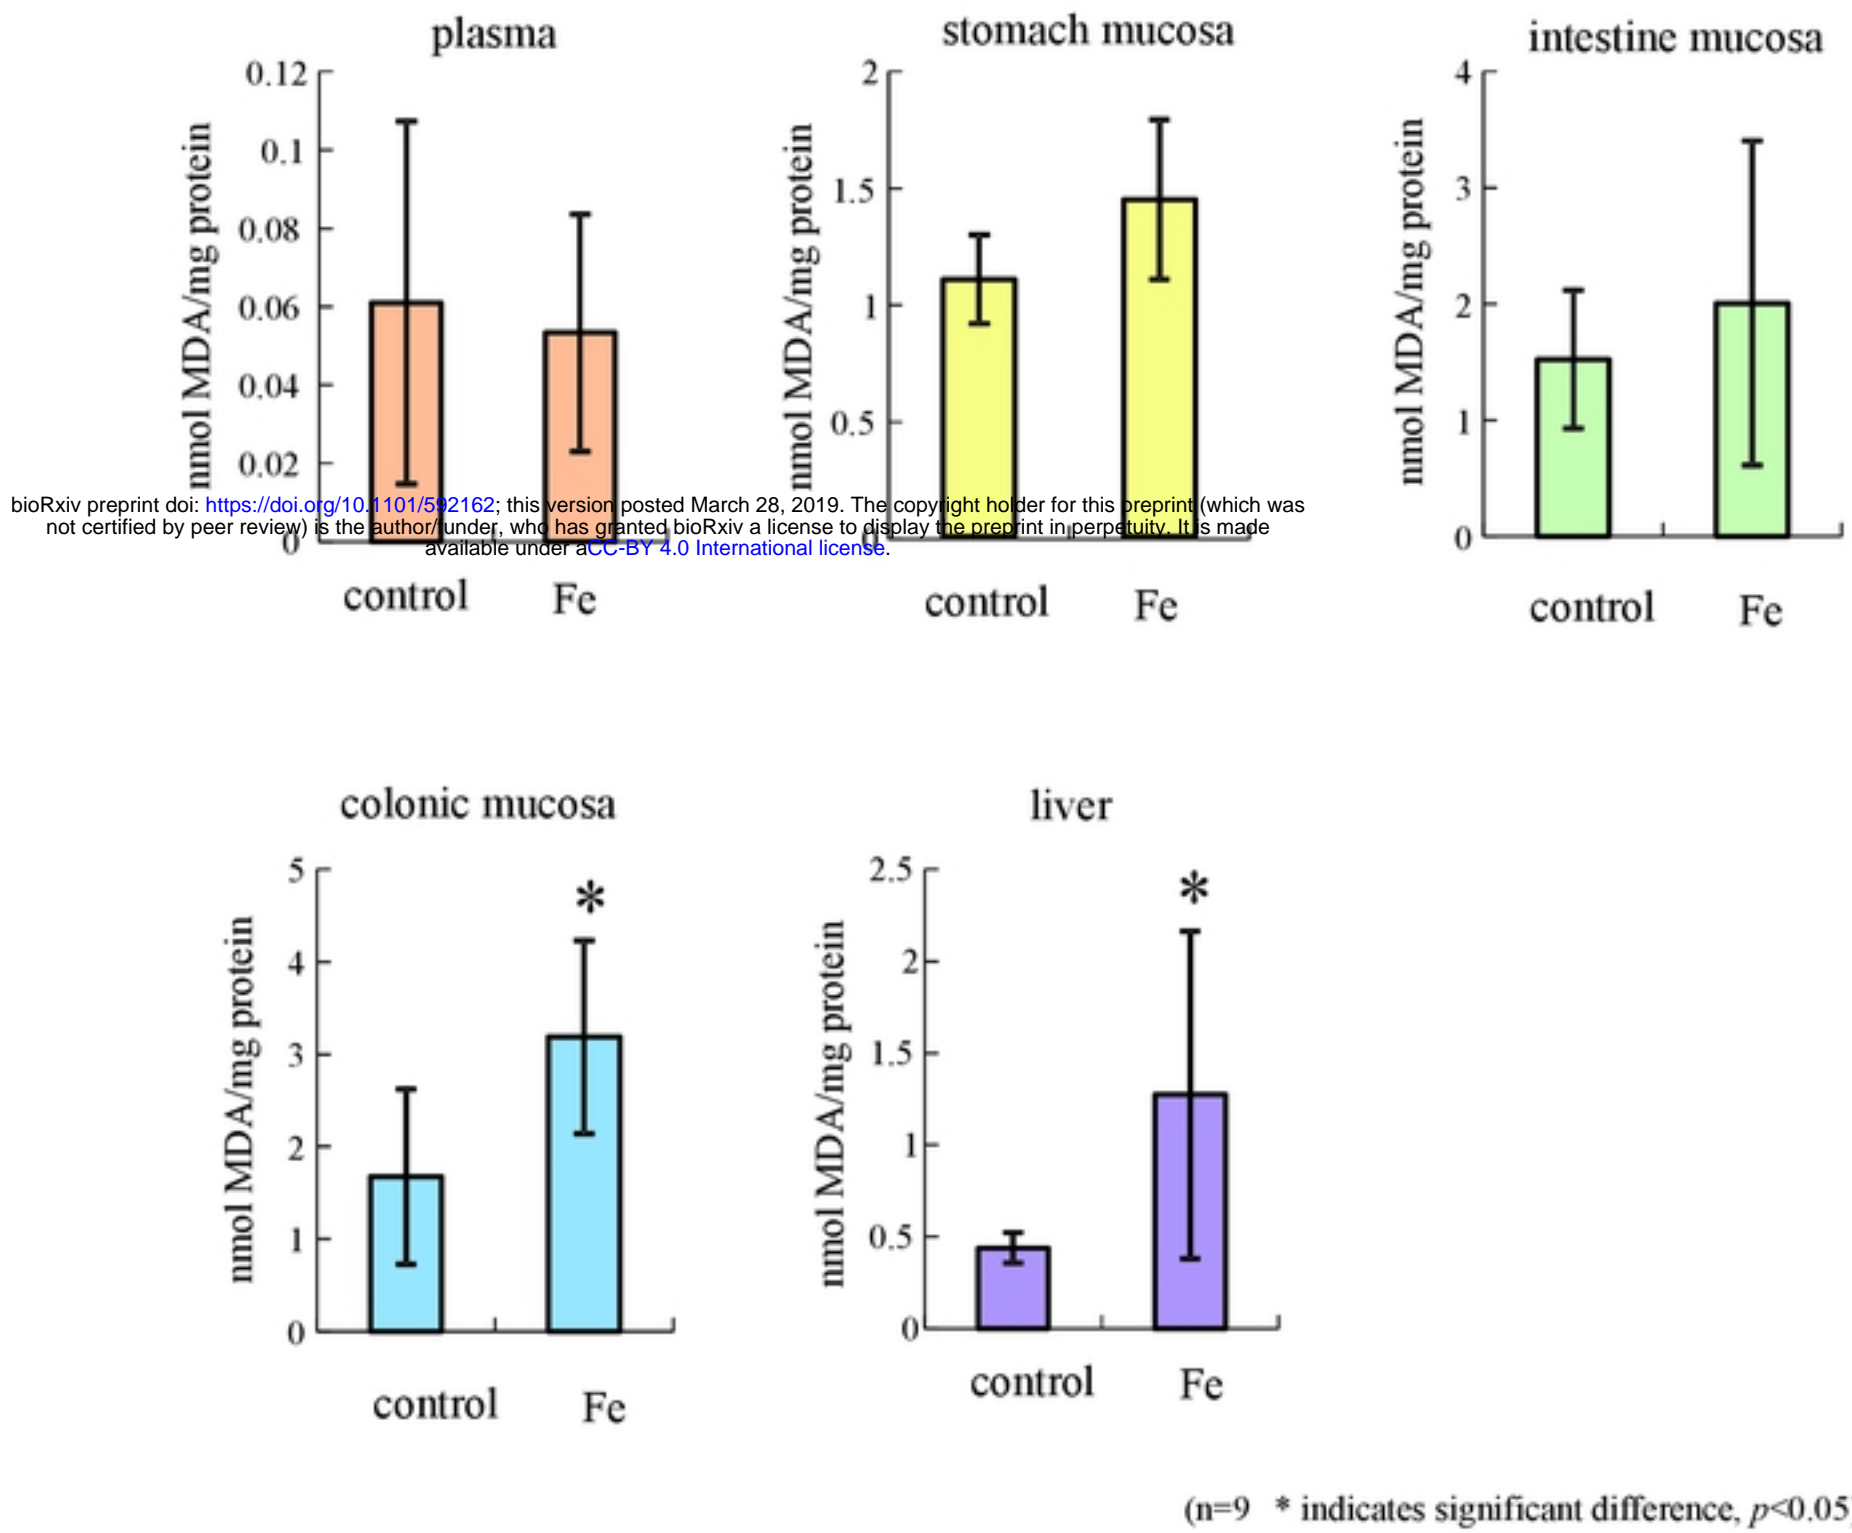

**Fig 5. Lipid peroxidation levels of plasma and tissues obtained from iron-overloaded rats.**

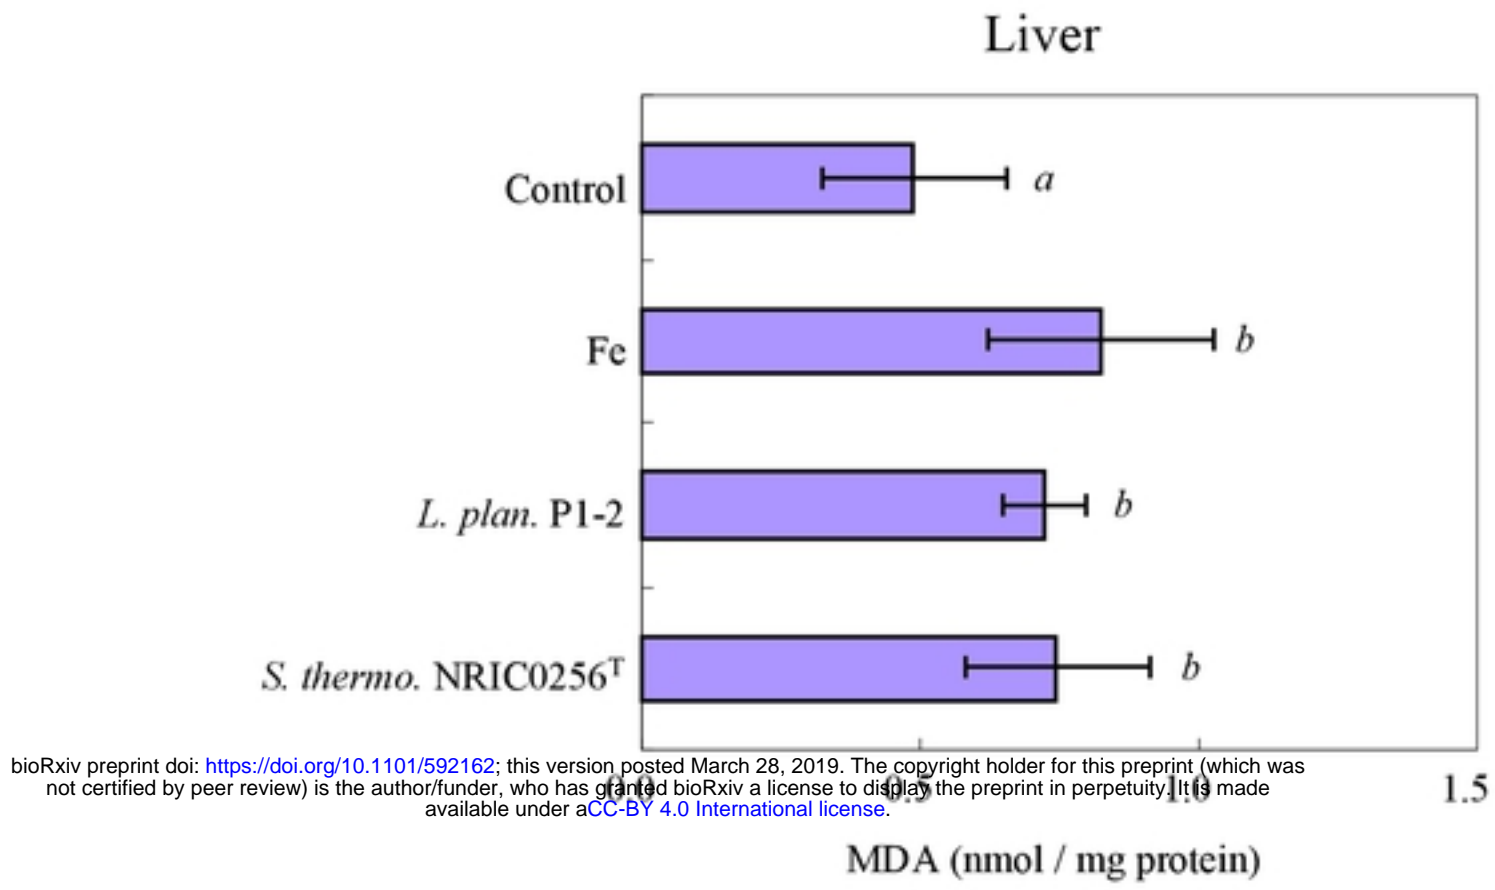

bioRxiv preprint doi: <https://doi.org/10.1101/592162>; this version posted March 28, 2019. The copyright holder for this preprint (which was not certified by peer review) is the author/funder, who has granted bioRxiv a license to display the preprint in perpetuity. It is made available under aCC-BY 4.0 International license.

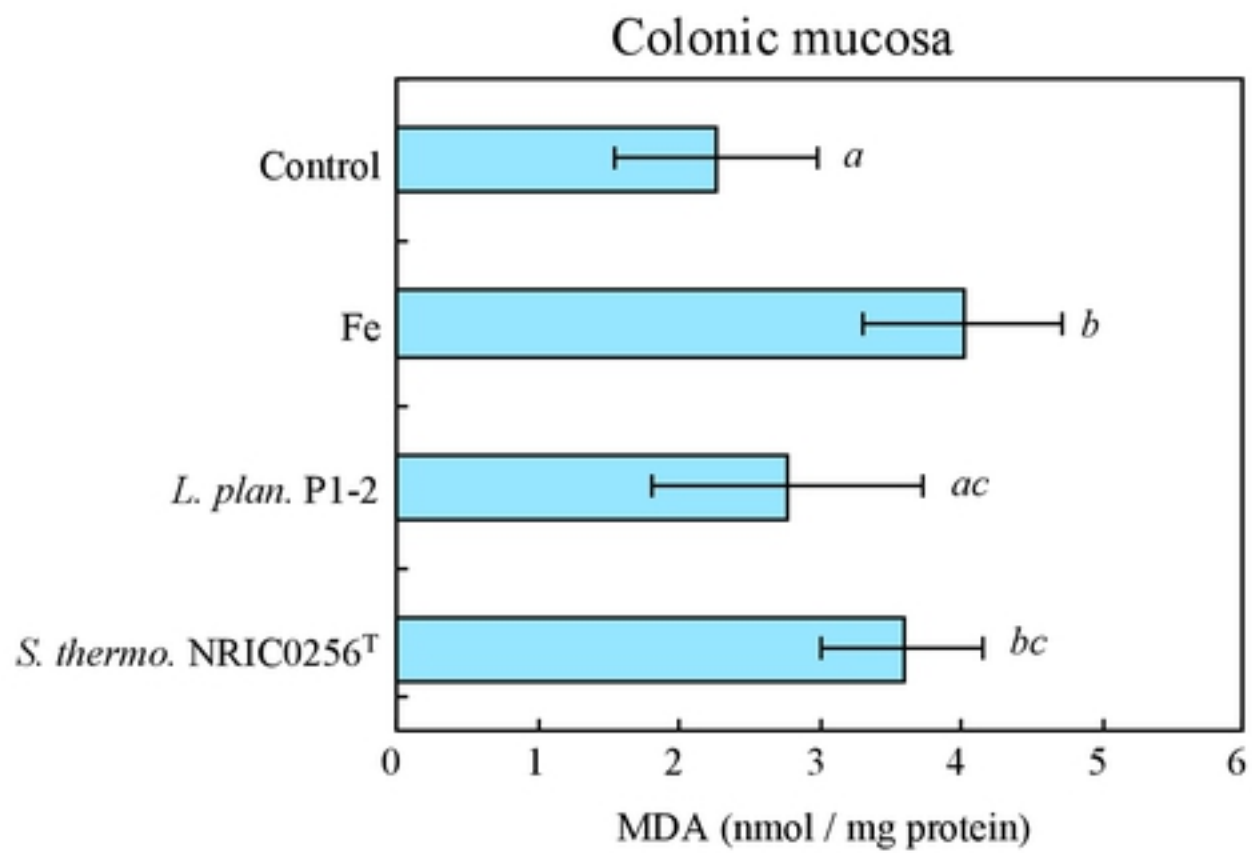

(n=6, different letters indicate a significant difference  $p < 0.05$ )

**Fig 6. The effect of lactic acid bacteria administration on lipid hydroperoxide-eliminating activity in iron overloaded rats, using a colonic mucosal lipid peroxidation model.**
